# Supplementary material for: Systematic review to evaluate a potential association between helminth infection and physical stunting in children
Source: Parasit Vectors. 2022 Apr 20;15:135. doi: 10.1186/s13071-022-05235-5 (PMC9022337; doi:10.1186/s13071-022-05235-5)
Supplement: Supplementary file 4 — Additional file 4. Table of all included studies. [file 13071_2022_5235_MOESM4_ESM.xlsx]

## Sheet: Included studies - by ROB
Authors	Title	Year	Journal	Country	Helminth type	Study design	Randomisation?	Randomisation method	Blinding?	Groups blinded	Follow up timepoints	Study setting	Population of interest	Sample size (final)	Comparator group?	Diagnostic tests	Infection intensity measured?	Anthelmintic treatment	ROB - overall grade	ROB - reasons/details	Association found between helminth infection and stunting?
Assis et al	Schistosoma mansoni infection and nutritional status in schoolchildren: a randomized, double-blind trial in northeastern Brazil	1998	American Journal of Clinical Nutrition	Brazil	schisto	RCT	Yes	NR	Yes	Participants and investigators	6 and 12 months	U	SAC	353	Yes	KK	Yes (but only light-moderate included)	OXA	Low	Only light-moderately infected children enrolled but control group, repeat faecal samples checked if 1st faecal sample positive	No
Beach et al	Assessment of combined ivermectin and albendazole for treatment of intestinal helminth and Wuchereria bancrofti infections in Haitian schoolchildren	1999	American Journal of Tropical Medicine & Hygiene	Haiti	STHs	RCT	Yes	random number table	Yes	Participants and investigators	5 weeks, 4 months, 1 year	U	SAC	853	Yes	Modified Stoll method	Yes	ALB + IVE	Low	Modified Stoll faecal testing but large sample size, double-blind, randomised and treatment observed	No
Forrester et al	Randomised trial of albendazole and pyrantel in symptomless trichuriasis in children	1998	Lancet	Mexico	STHs	Randomised trial	Yes	Block randomisation	Yes	Participants and investigators	4, 8 and 12 months	U	PSAC+SAC	508	Yes	KK	Yes	ALB + PP	Low	Randomised and double-blinded with 3 different interventions groups but control group deemed unethical, kato katz faecal testing, reasonable follow-up time, treatment observed, concerns re possible adverse/toxic effects in high dose albendazole intervention group	Possibly
Greenberg et al	Single dose piperazine therapy for Ascaris lumbricoides: an unsuccessful method of promoting growth	1981	American Journal of Clinical Nutrition	Bangladesh	STHs	RCT	Yes	NR	Yes	Participants and investigators	6 and 11 months	U	PSAC+SAC	152	Yes	Direct smear, merthiolate iodine formalin solution (to stain and preserve parasite eggs)	Yes	PIP	Low	Randomised, double-blind, control group but insensitive diagnostic test used (more useful for protozoa)	No
Gupta et al	Effect of periodic antiascaris and antigiardia treatment on nutritional status of preschool children	1982	American Journal of Clinical Nutrition	Guatemala	STHs	RCT	Yes	NR	Yes	Participants only	12 months	R	PSAC	159	Yes	Formol-ether concentration method	No	PIP	Low	Randomised, control group, participants blinded, sensitive diagnostic test used, treatment observed, possible confounding by giardiasis	No
Lai et al	Ascaris and Trichuris do not contribute to growth retardation in primary school children	1995	Southeast Asian Journal of Tropical Medicine & Public Health	Malaysia	STHs	RCT	Yes	Block randomisation and even/odd ending numbers	Yes	Participants only	6, 12, 18 and 24 months	U+PU	SAC	353	Yes	Stoll dilution technique	Yes	MEB + PP	Low	Randomised, single-blind, quantitative and appropriate diagnostic test used, treatment observed, control group and 3 stool samples checked at enrollment	No
Larocque et al	A double-blind randomized controlled trial of antenatal mebendazole to reduce low birthweight in a hookworm-endemic area of Peru	2006	Tropical Medicine & International Health	Peru	STHs	RCT	Yes	Computer-generated randomly ordered blocks	Yes	Participants and investigators	Baseline (2nd trimester), 3rd trimester and delivery	R+PU	PW	950	Yes	KK	Yes	MEB	Low	Randomised, double-blind, large sample size, appropriate diagnostic test	Possibly
Liu et al	Effect of deworming on indices of health, cognition, and education among schoolchildren in rural China: A cluster-randomized controlled trial	2017	American Journal of Tropical Medicine and Hygiene	China	STHs	RCT	Yes	Randomisation by township (cluster), computerised random sequence generator	No	NA	6 and 11 months	R	SAC	2028	Yes	KK	Yes	ALB	Low	Randomisation by township, control group received no intervention (not a placebo), no explicit blinding but control group not aware they were part of a trial, large sample size, 2 faecal samples collected from consecutive days, appropriate diagnostic test, treatment not observed	No
McGarvey et al	Schistosomiasis japonica and childhood nutritional status in northeastern Leyte, the Philippines: a randomized trial of praziquantel versus placebo	1996	American Journal of Tropical Medicine & Hygiene	Philippines	schisto	RCT	Yes	Random numbers	Yes	Participants and investigators	6 months	R	PSAC+SAC	170	Yes	KK	Yes	PZQ	Low	Only infected children enrolled, very wide age range, randomised and double-blind, treatment observed, relatively short follow-up	No
KF Michaelsen	Hookworm infection in Kweneng District, Botswana, A prevalence survey and a controlled treatment trial	1985	Transactions of the Royal Society of Tropical Medicine & Hygiene	Botswana	STHs	RCT	Yes	NR	NR	NR	2 weeks, 5 months	R	SAC	195	Yes	Brine flotation method, Stoll's technique, test-tube hatching for species identification	Yes	TET	Low	Randomised, blinding not reported, different anthelmintic used compared with most studies, relatively short follow-up, appropriate diagnostic tests	No
Mofid et al	A Double-Blind Randomized Controlled Trial of Maternal Postpartum Deworming to Improve Infant Weight Gain in the Peruvian Amazon	2017	PLoS Neglected Tropical Diseases	Peru	STHs	RCT	Yes	Computer-generated random number sequence	Yes	Particpants and investigators	1 and 6 months	NR	BFW	968	Yes	KK, direct smear and ethyl-ether concentration method on stored samples after 6 months	Yes	ALB	Low	Randomised, double-blinded, large sample size, appropriate diagnostic tests	Possibly
Ndibazza et al	Effects of deworming during pregnancy on maternal and perinatal outcomes in Entebbe, Uganda: a randomized controlled trial	2010	Clinical Infectious Diseases	Uganda	STHs + schisto	RCT	Yes	Block randomisation using Stata	Yes	Participants and investigators	at delivery and 14 weeks after delivery	PU+R	PW	2289	Yes	KK, charcoal culture for S. strongyloides	Yes	ALB + PZQ	Low	Randomised, double-blinded, large sample size, appropriate diagnostic tests	Possibly
Nga et al	Decreased parasite load and improved cognitive outcomes caused by deworming and consumption of multi-micronutrient fortified biscuits in rural Vietnamese schoolchildren	2011	American Journal of Tropical Medicine and Hygiene	Vietnam	STHs	RCT	Yes	Block randomisation using computer-generated list	Yes	Participants and investigators	2 and 4 months	R	SAC	482	Yes	KK	Yes	ALB	Low	Randomised, double-blind, appropriate sample size and diagnostic test	No
Northrop-Clewes et al	Anthelmintic treatment of rural Bangladeshi children: effect on host physiology, growth, and biochemical status	2001	American Journal of Clinical Nutrition	Bangladesh	STHs	RCT	Yes	Household numbers from clinic records (randomised by village)	Yes	Participants and investigators	2, 4, 6, 8 and 12 months	R	PSAC	117	Yes	Modified ether sedimentation technique	Yes	PP + MEB	Low	Randomised by village, double-blind, control group, long follow up	No
Rousham et al	An 18-month study of the effect of periodic anthelminthic treatment on the growth and nutritional status of pre-school children in Bangladesh	1994	Annals of Human Biology	Bangladesh	STHs	RCT	Yes	NR (randomised by village)	NR	NR	18 months	R	PSAC+SAC	1402	Yes	Modified sedimentation technique	Yes	MEB	Low	Randomisation by village, large sample size, appropriate diagnostic test, control group	No
Stoltzfus et al	Low dose daily iron supplementation improves iron status and appetite but not anemia, whereas quarterly anthelminthic treatment improves growth, appetite and anemia in Zanzibari preschool children	2004	Journal of Nutrition	Tanzania	STHs	RCT	Yes	Block randomisation (randomised by household)	Yes	Participants and investigators	12 months	R	PSAC+SAC	459	Yes	KK	Yes	MEB	Low	Randomised by household, double-blind, large sample size, appropriate diagnostic test, treatment observed, possible malaria confounder	No
Taylor et al	The effect of different anthelmintic treatment regimens combined with iron supplementation on the nutritional status of schoolchildren in KwaZulu-Natal, South Africa: a randomized controlled trial	2001	Transactions of the Royal Society of Tropical Medicine & Hygiene	South Africa	STHs + schisto	RCT	Yes	NR	Yes	Participants and investigators	6 and 12 months	R	SAC	275	Yes	Formol-ether concentration method, Ecur dipstick test on urine	NR	ALB + PZQ	Low	Randomised, double-blind, sensitive diagnostic tests (Ecur possibly less so), long follow-up time, treatment observed	No
Watkins & Pollitt	Effect of removing Ascaris on the growth of Guatemalan schoolchildren	1996	Pediatrics	Guatemala	STHs	RCT	Yes	NR	Yes	Participants and investigators	12 and 24 weeks	NR	SAC	228	Yes	KK	Yes	ALB	Low	Randomised, double-blind, appropriate diagnostic test, relatvely short follow-up	No
Willett et al	Ascaris and growth rates: a randomized trial of treatment	1979	American Journal of Public Health	Tanzania	STHs	RCT	Yes	Random number table	Yes	Participants and investigators	12 months	R	PSAC+SAC	273	Yes	Modified formol-ether concentration technique	Yes	LEV	Low	Randomised, double-blind, appropriate diagnostic test, treatment observed, relatively long follow-up	No
Yap et al	Effect of deworming on physical fitness of school-aged children in Yunnan, China: a double-blind, randomized, placebo-controlled trial	2014	PLoS Neglected Tropical Diseases	China	STHs	RCT	Yes	Block randomisation	Yes	Participants and investigators	1, 4 and 6 months	R	SAC	194	Yes	KK, Baermann	Yes	ALB	Low	Randomised, double-blind, relatively short follow-up, treatment observed, appropriate diagnostic test combination	No
Akpan et al	Antenatal Deworming and Materno-Perinatal Outcomes in Calabar, Nigeria	2018	Macedonian Journal of Medical Sciences	Nigeria	STH's	RCT	Yes	Computer-generated random numbers	Yes	Participants and investigators	At delivery	NA	PW	530	Yes	NA	NA	MEB	Low	Randomised, double-blind, treatment observed, reasonable sample size, helminths not diagnosed	No
Abudho et al	Evaluation of morbidity in Schistosoma mansoni-positive primary and secondary school children after four years of mass drug administration of praziquantel in western Kenya	2020	Infectious Diseases of Poverty	Kenya	schisto + STHs	Pre-Post study	Yes	NR	NA	NA	Baseline and 5 years later (after 4 years MDA)	R	SAC	69 (year 5)	No	KK	Yes, for S. mansoni only	PZQ + ALB	Medium	Only S. mansoni positive children enrolled and assessed, Kato-Katz faecal testing, no comparator group, treatment observed, malaria possible confounder	No
Awasthi et al	Effectiveness and cost-effectiveness of albendazole in improving nutritional status of pre-school children in urban slums	2000	Indian Pediatrics	India	STHs	RCT	Yes	Participants allocated a serial number (odd/non-zero ending placebo group, rest tx group)	Yes	Participants only	2 years	U	PSAC	1045	Yes	Direct smear	No	ALB	Medium	Only single blinding so some children offered ABZ instead of placebo by project workers at each tx stage, calcium placebo could potentially have affected growth, direct smear faecal method, large sample size	No
Befidi-Mengue et al	The impact of Schistosoma haematobium infection and of praziquantel treatment on the growth of primary school children in Bertoua, Cameroon	1992	Journal of Tropical Medicine & Hygiene	Cameroon	schisto + STHs	RCT	Yes (but according to intensity of infection)	NR	Yes	Participants and investigators	6 months	U	SAC	653	Yes	Sedimentation and wet mount, Ames dipstick reagent strips (urine), direct smear (faeces)	Yes	PZQ	Medium	Randomised after stratified according to infection intensity, only male students eligible for study, double-blind intervention, malaria potential confounder	No
Coutinho et al	Nutritional status improves after treatment of schistosoma japonicum-infected children and adolescents	2006	Journal of Nutrition	Philippines	schisto	Pre-Post study	NA	NA	NA	NA	4 weeks, then q3months until 18 months	R	SAC	477	No	KK, PCR for hookworm species	Yes	PZQ	Medium	Only infected children included in study but 3 stool samples checked prior to enrollment, Tanner staging performed to account for puberty, PCR testing to distinguish hookworm species, wide age range of participants (some technically adults)	Possibly
Degarege et al	Association between intestinal helminth infections and underweight among school children in Tikur Wuha Elementary School, Northwestern Ethiopia	2013	Journal of Infection and Public Health	Ethiopia	STHs + schisto	Pre-Post study	NA	NA	NA	NA	4 weeks	R	SAC	403	No	KK and concentration method	Yes	ALB + PZQ	Medium	Only infected children treated, very short follow-up time, no comparator group	No
Donnen et al	Vitamin A supplementation but not deworming improves growth of malnourished preschool children in eastern Zaire	1998	Journal of Nutrition	DRC	STHs	RCT	Yes	NR	NR	NR	q2weeks for 3 months, then q3months until 12 months	NR	I	311	Yes	KK	Yes	MEB	Medium	Selection bias as children in hospital for severe malnutrition initially, randomisation method not reported, nor whether there was any blinding for the interventions	No
Dossa et al	Impact of iron supplementation and deworming on growth performance in preschool Beninese children	2001	European Journal of Clinical Nutrition	Benin	STHs	RCT	Yes	NR	Yes	Participants and investigators	1, 3 and 10 months	R	PSAC	140	Yes	Direct smear, Kato's concentration method	Yes	ALB	Medium	Randomised but method not reported, abstract states double-blind but no further details, combination of direct smear and Kato concentration method used (direct smear poor diagnostic test for helminth eggs), short trial (3 months) but follow up 7 months later, treatment observed	No
Efunshile, A M	School based mass de-worming initiative in South-West Nigeria	2017	African Journal of Clinical and Experimental Microbiology	Nigeria	STHs	Pre-Post study	NA	NA	NA	NA	6 months	U	PSAC+SAC	957	No	Direct microscopy	No	ALB	Medium	Direct microscopy faecal exams (poor sensitivity for helminth eggs, better for protozoa or helminth larvae), considered unethical to have a control group so divided children unto unfected vs un-infected at baseline and all treated, high prevalence levels reported despite use if insensitive diagnostic tests (possible under-reporting)	No
Fernando et al	Geo-helminth infections in a rural area of Sri Lanka	2001	Southeast Asian Journal of Tropical Medicine and Public Health	Sri Lanka	STHs	Pre-Post study	NA	NA	NA	NA	12 and 24 months	R	SAC	349	Yes	Direct saline smears	No	MEB	Medium	Low sensitivity diagnostic test, nutritional status better at baseline in infected children than un-infected, over-the-counter anthelmintics widely available in the study area so may have influenced prevalence levels	No
Garg et al	Evaluation of the Integrated Management of Childhood Illness guidelines for treatment of intestinal helminth infections among sick children aged 2-4 years in western Kenya	2002	Transactions of the Royal Society of Tropical Medicine & Hygiene	Kenya	STHs	RCT	Yes	Computer-generated random number list	Yes	Lab staff and investigators at 6 month follow-up, unclear re participants	6 months	NR	PSAC	347	Yes	Formol-ethyl acetate concentration method	No	MEB	Medium	Selection bias as sick pre-school children enrolled, then only those without palmar pallor randomised for trial, good sensitivity qualitative diagnostic test used, treatment observed, control group	Possibly
Goto et al	Impact of anti-Giardia and anthelminthic treatment on infant growth and intestinal permeability in rural Bangladesh: a randomised double-blind controlled study	2009	Transactions of the Royal Society of Tropical Medicine & Hygiene	Bangladesh	STHs	RCT	Yes	Randomisation function in SPSS	Yes	Participants and investigators	12, 24 and 36 weeks	R	I	222	Yes	Formalin-ether faecal concentration technique	No	ALB	Medium	Randomised and double-blinded but confusion with intervention groups and treatment received so groups had to be re-assigned for analysis and not by untention to treat, sensitive but qualitative diagnostic test	No
Hadju et al	Relationships between soil-transmitted helminthiases and growth in urban slum schoolchildren in Ujung Pandang, Indonesia	1997	International Journal of Food Sciences & Nutrition	Indonesia	STHs	RCT	Yes	based on sex and A.lumbricoides egg count	Yes	Participants and investigators	3, 6 and 12 months	U	SAC	330	Yes	Modified KK	Yes	ALB + PP	Medium	Randomised but based on sex and helminth egg count, double-blind, control group, kato-katz faecal testing	Yes
Hadju et al	Improvements of growth, appetite, and physical activity in helminth-infected schoolboys 6 months after single dose of albendazole	1998	Asia Pacific Journal of Clinical Nutrition	Indonesia	STHs	Controlled trial	No	NA	NR	NR	6 months	U	SAC	129	Yes	Modified KK	Yes	ALB	Medium	Not randomised, only boys enrolled, all children infected at baseline, unclear whether any blinding, control group, kato-katz diagnostic testing	Possibly
Hagel et al	Helminthic infection and anthropometric indicators in children from a tropical slum: Ascaris reinfection after anthelmintic treatment	1999	Journal of Tropical Pediatrics	Venezuela	STHs	Pre-Post study	NA	NA	NA	NA	12 months, then 8 month check for re-infection	U	SAC	154	Yes	MIFC	No	OP/PP	Medium	Placebo control group deemed unethical but sub-group of un-infected children acted as a control group, unclear regarding specific parasitological diagnostic test used but likely insensitive from methods described, but serial stool samples collected	Possibly
Halpenny et al	Regional, household and individual factors that influence soil transmitted helminth reinfection dynamics in preschool children from rural indigenous Panama	2013	PLoS Neglected Tropical Diseases	Panama	STHs	Pre-Post study	NA	NA	NA	NA	3, 9 and 16 months	R	PSAC	215	Yes	KK, FLOTAC	Yes	ALB	Medium	Children living in extreme poverty enrolled, sensitive diagnostic tests, treatment observed	No
Hesham Al-Mekhlafi et al	Pattern and predictors of soil-transmitted helminth reinfection among aboriginal schoolchildren in rural Peninsular Malaysia	2008	Acta Tropica	Malaysia	STHs	Pre-Post study	NA	NA	NA	NA	3 and 6 months	R	SAC	120	Yes	Modified cellophane thick smear (KK), Harada-Mori	Yes	ALB	Medium	Sensitive diagnostic test combination, treatment observed, uses p-value of 0.2 as elimination criterion for univariate and multiple logistic regression (instead of usual 0.05)	No
Hlaing, T	The effect of targeted chemotherapy against ascariasis on the height of children in rural Myanmar	1994	Transactions of the Royal Society of Tropical Medicine and Hygiene	Myanmar	STHs	RCT	Yes	NR	NR	NR	6, 12, 18, 24 months	R	PSAC+SAC	218	Yes	NR	NR	LEV	Medium	Short report so limited data, sub-group of previous study participants (Thein et al, 1991), unclear whether placebo or no treatment for control group, diagnostic test not reported	Possibly
Humphries et al	Effectiveness of albendazole for hookworm varies widely by community and correlates with nutritional factors: A cross-sectional study of school-age children in Ghana	2017	American Journal of Tropical Medicine and Hygiene	Ghana	STHs	Pre-Post study	NA	NA	NA	NA	10-14 days	NR	SAC	76	No	KK	Yes	ALB	Medium	Only hookworm infected children treated, very short follow-up (drug efficacy trial), reasonable diagnostic test although timing important for hookworm egg detection, treatment observed	No
Hurlimann et al	Effect of deworming on school-aged children's physical fitness, cognition and clinical parameters in a malaria-helminth co-endemic area of Cote d'Ivoire	2014	BMC Infectious Diseases	Côte d'Ivoire	STHs + schisto	Pre-Post Study	NA	NA	NA	NA	5 months	R	SAC	213	Yes	KK, urine filtration	Yes	ALB + PZQ	Medium	Relatively short follow-up period, appropriate diagnostics, possible confounding by malaria/giardiasis	No
Jinabhai et al	Epidemiology of helminth infections: implications for parasite control programmes, a South African perspective	2001	Public Health Nutrition	South Africa	STHs + schisto	RCT	Yes	NR	NR	NR	2 and 16 weeks	R	SAC	268	Yes	Direct smear, urine filtration	Yes	ALB + PZQ	Medium	Randomisation but blinding not reported, unclear diagnostic faecal testing, methods incorrectly describe weight-for-age as a measure of wasting	No
Jinabhai et al	A randomized controlled trial of the effect of antihelminthic treatment and micronutrient fortification on health status and school performance of rural primary school children	2001	Annals of Tropical Paediatrics	South Africa	STHs + schisto	RCT	Yes	NR	Yes	Participants and investigators	16 weeks	R	SAC	579	Yes	Direct smear, urine filtration	Yes	ALB + PZQ	Medium	Randomised and double-blind but unclear diagnostic faecal test and incorrect infection intensity categories provided for S.haematobium, relatively short follow-up but limited by school term length, control group, possible confounding due to micronutritent status and supplements	No
Joseph et al	The Effect of Deworming on Growth in One-Year-Old Children Living in a Soil-Transmitted Helminth-Endemic Area of Peru: A Randomized Controlled Trial	2015	PLoS Neglected Tropical Diseases	Peru	STHs	RCT	Yes	Block randomisation - computer generated	Yes	Participants and investigators	6 and 12 months	R	I	1563	Yes	KK or direct smear	Yes	MEB	Medium	Randomisation, double-blind, large and appropriate sample size, control group, treatment observed, less sensitive diagnostic faecal test used for children receiving placebo as part of trial compared to those receiving deworming treatment, compliance issues as about 25% of participants received deworming from outside the trial during study period	No
Kightlinger et al	Ascaris lumbricoides aggregation in relation to child growth status, delayed cutaneous hypersensitivity, and plant anthelmintic use in Madagascar	1996	Journal of Parasitology	Madagascar	STHs	Pre-Post study	NA	NA	NA	NA	12 months	R	PSAC+SAC	550	No	Formalin-detergent sedimentation method	Yes	MEB + PP	Medium	Very high helminth prevalence and heavy intensity infections at baseline, diagnostic test can be used for semi-quantitative results as in this case, long follow-up period but potentially high risk of re-infection	No
Kruger et al	Effects of iron fortification in a school feeding scheme and anthelmintic therapy on the iron status and growth of six- to eight-year-old schoolchildren	1996	Food and Nutrition Bulletin	South Africa	STHs	RCT	Yes	NR	NR	NR	6 and 11 months	U+R	SAC	134	Yes	Direct smear	No	ALB	Medium	Randomised, blinding not reported, insensitive diagnostic test for helminths, treatment observed, possible confounding due to micronutrient supplementation	No
Longfils et al	Weekly iron and folic acid supplementation as a tool to reduce anemia among primary school children in Cambodia	2005	Nutrition Reviews	Cambodia	STHs	Cluster intervention study	NA	NA	NA	NA	12 months	R	SAC	412	Yes	KK, sodium-acetate-acetic-formalin (SAF) method, Baermann	Yes	MEB	Medium	Pre-post cluster study, discrepencies and confusion regarding accurate age of children, combination of sensitive diagnostic tests, possible confounding from micronutrient deficiency and supplements	No
S Mahendra Raj	Intestinal geohelminthiasis and growth in pre-adolescent primary school children in Northeastern Peninsular Malaysia	1998	Southeast Asian Journal of Tropical Medicine & Public Health	Malaysia	STHs	Pre-Post study	No	NA	No	NA	12 months	U	SAC	98	Yes	Modified Stoll count	Yes	ALB	Medium	High baseline prevalence, only infected children treated, appropriate diagnostic test	No
Nokes et al	Evidence for an improvement in cognitive function following treatment of Schistosoma japonicum infection in Chinese primary schoolchildren	1999	American Journal of Tropical Medicine & Hygiene	China	STHs + schisto	RCT	Yes	NR	Yes	Participants and investigators	3 months	NR	SAC	181	Yes	KK	Yes	ALB + PZQ	Medium	Only infected children recruited, relatively short follow-up time, randomised, double-blind, appropriate sample size and diagnostic test	No
Osakunor et al	Dynamics of paediatric urogenital schistosome infection, morbidity and treatment: a longitudinal study among preschool children in Zimbabwe	2018	BMJ Global Health	Zimbabwe	schisto	Pre-Post study	NA	NA	NA	NA	3 and 12 months	R	PSAC	156	Yes	Urine filtration method, KK	Yes	PZQ	Medium	Only infected children treated, small sample size, appropriate diagnostics	Yes
Ostwald et al	The effect of intestinal parasites on nutritional status in well-nourished school-age children in the highlands of Papua New Guinea	1984	Nutrition Reports International	PNG	STHs	RCT	Yes	coin toss	NR	NR	2 and 5 months	R	SAC	87	Yes	Concentrated saline dilutions and McMaster	Yes	MEB	Medium	Small sample size, control group un-treated (not placebo), randomisation, appropriate diagnostic test	No
Passerini et al	Increased birth weight associated with regular pre-pregnancy deworming and weekly iron-folic acid supplementation for Vietnamese women	2012	PLoS Neglected Tropical Diseases	Vietnam	STHs	Controlled trial	NA	NA	NA	NA	at delivery	R	PW	463	Yes	NA	NA	ALB	Medium	No randomisation, control hospital women were un-treated (no placebo), appropriate sample size but no diagnostic testing for helminths	Yes
Sarkar et al	Effect of deworming on nutritional status of Ascaris infested slum children of Dhaka, Bangladesh	2002	Indian Pediatrics	Bangladesh	STHs	RCT	Yes	Random number table	Yes	Participants and investigators	4 months	U	PSAC+SAC	81	Yes	Direct smear	No	PP	Medium	Only infected children enrolled, brief report rather than full article so limited data, insensitive diagnostic test used, small sample size, relatively short follow-up	No
Satya Deepti et al	Effects of deworming during pregnancy on maternal and perinatal outcomes: A randomized controlled trial	2015	Research Journal of Pharmaceutical, Biological and Chemical Sciences	India	STHs	RCT	Yes	Block randomisation using Stata	Yes	Participants and investigators	At delivery and then within 14 weeks of delivery	PU+R	PW	408	Yes	NR	Yes	ALB + MEB	Medium	Randomised, double-blind, large sample size, diagnostic test not reported but stool samples collected, treatment oberved	No
Shield et al	Intestinal helminthiasis and nutritional status including iron, zinc and copper in Papua New Guinea urban children aged 1 to 5 years and effect of anthelmintic intervention	1986	Papua New Guinea Medical Journal	PNG	STHs	Pre-Post study	NA	NA	NA	NA	3, 6 and 8 months	U	PSAC	281?	Yes	Harada-Mori culture, direct smears and McMaster	Yes	PP, MEB + THI	Medium	Only infected children treated, small sample size, appropriate diagnostics but some combined egg count data, malaria possible confounder	No
Simeon et al	Treatment of Trichuris trichiura infections improves growth, spelling scores and school attendance in some children	1995	Journal of Nutrition	Jamaica	STHs	RCT	Yes	Random number table	NR	NR	6 months	U+R	SAC	392	Yes	KK	Yes	ALB	Medium	Randomised, appropriate diagnostic test, relatively short follow-up	No
Sircar et al	Schistosoma mansoni Mass Drug Administration Regimens and Their Effect on Morbidity among Schoolchildren over a 5-Year Period-Kenya, 2010-2015	2018	American Journal of Tropical Medicine & Hygiene	Kenya	STHs + schisto	Pre-Post study	NA	NA	NA	NA	1, 3 and 5 years	R	SAC	512 (year 5)	Yes	KK	Yes (for S. mansoni only)	PZQ + ALB	Medium	Long follow-up period to evaluate MDA, appropriate diagnostic test, large sample size, comparing school-based deworming group with community-based deworming group	No
Staudacher et al	Soil-transmitted helminths in southern highland Rwanda: associated factors and effectiveness of school-based preventive chemotherapy	2014	Tropical Medicine & International Health	Rwanda	STHs	Pre-Post study	NA	NA	NA	NA	2 and 15 weeks	R+U	SAC	510	Yes	KK, real-time PCR for A. lumbricoides, 10% checked by formalin-ethyl acetate microscopy	Yes	MEB	Medium	Very short follow-up evaluating MDA efficacy, appropriate diagnostic tests (PCR very sensitive), large sample size	Yes
Stephenson et al	Relationships between Ascaris infection and growth of malnourished preschool children in Kenya	1980	American Journal of Clinical Nutrition	Kenya	STHs	Pre-Post study	NA	NA	NA	NA	14 and 28 weeks	R	PSAC+SAC	290	Yes	Modified Telemann's method	No	LEV	Medium	Unclear re sensitivity of diagnostic tests used, reasonable follow-up period	No
Stephenson et al	Relationships of Schistosoma haematobium, hookworm and malarial infections and metrifonate treatment to growth of Kenyan school children	1985	American Journal of Tropical Medicine & Hygiene	Kenya	STHs + schisto	RCT	Yes	NR	NR	NR	6 months	NR	SAC	399	Yes	Modified KK, nuclepore filter method for S. haematobium	Yes	MET	Medium	Only infected children enrolled, randomised, large sample size, appropriate diagnostic tests, control group, possible malaria confounder	No
Stephenson et al	Single dose metrifonate or praziquantel treatment in Kenyan children. II. Effects on growth in relation to Schistosoma haematobium and hookworm egg counts	1989	American Journal of Tropical Medicine & Hygiene	Kenya	STHs + schisto	Controlled trial	NA	NA	NR	NR	8 months	NR	SAC	312	Yes	NR	Yes	PZQ/MET	Medium	Unclear re allocation to intervention groups but not randomised, reasonable follow-up period, diagnostic tests not reported, large sample size	No
Stephenson et al	Treatment with a single dose of albendazole improves growth of Kenyan schoolchildren with hookworm, Trichuris trichiura, and Ascaris lumbricoides infections	1989	American Journal of Tropical Medicine & Hygiene	Kenya	STHs	RCT	Yes	NR	Yes	Investigators only?	6 months	NR	SAC	150	Yes	Modified KK	Yes	ALB	Medium	Randomised, small sample size, appropriate diagnostic test, relatively short follow-up, treatment observed	Yes
Stephenson et al	Physical fitness, growth and appetite of Kenyan school boys with hookworm, Trichuris trichiura and Ascaris lumbricoides infections are improved four months after a single dose of albendazole	1993	Journal of Nutrition	Kenya	STHs	RCT	Yes	By descending hookworm egg count?	Yes	Investigators only?	4 months	NR	SAC	53	Yes	Modified KK	Yes	ALB	Medium	Only boys enrolled, small sample size, randomised according to hookworm egg counts, appropriate diagnostic test (although less sensitive for hookworm eggs)	Yes
Stoltzfus et al	School-based deworming program yields small improvement in growth of Zanzibari school children after one year	1997	Journal of Nutrition	Tanzania	STHs	RCT	Yes	NR (randomised by district)	NR	NR	12 months	NR	SAC	3063	Yes	KK, hemastix test strips for urine (microhaematuria used as a proxy indicator for S. haematobium)	Yes	MEB	Medium	Randomised by district, control group, large sample size, appropriate faecal diagnostic test, potentially less sensitive urinary diagnostic test	Yes
Tanner et al	Longitudinal study on the health status of children in a rural Tanzanian community: parasitoses and nutrition following control measures against intestinal parasites	1987	Acta Tropica	Tanzania	STHs + schisto	Community-based non-randomised trial	NA	NA	NA	NA	6 and 18 months	R	PSAC+SAC	170	Yes	Urine filtration and dipstick, KK, agar plate culture, merthiolate-iodine-formalin method mainly for protozoa	NR	ALB	Medium	Long follow-up, anthelmintic treatment not give as a sole intervention at any stage, sensitive combination if diagnostic tests, malaria possible confounder	No
Tee et al	Growth reduction among primary schoolchildren with light trichuriasis in Malaysia treated with albendazole	2013	Southeast Asian Journal of Tropical Medicine & Public Health	Malaysia	STHs	RCT	Yes	Randomisation software	NR	NR	3, 6 and 12 months	R	SAC	33	Yes	Modified Stoll's concentration technique	Yes	ALB	Medium	Only infected children enrolled, randomised, small sample size, relatively long follow-up, appropriate diagnostic tests but no repeat stool samples collected	No
Thein et al	A controlled chemotherapeutic intervention trial on the relationship between Ascaris lumbricoides infection and malnutrition in children	1991	Transactions of the Royal Society of Tropical Medicine & Hygiene	Myanmar	STHs	RCT	Yes	NR (randomised by village)	NA	NA	6 and 12 months	PU	SAC	2439	Yes	Direct smear	NR	LEV	Medium	Randomised by village, control group, long follow-up, insensitive diagnostic test, large sample size	Possibly
Walia et al	Routine deworming during antenatal care decreases risk of neonatal mortality and low birthweight: A retrospective cohort of survey data	2021	PLoS Neglected Tropical Diseases	Multi-country (56)	STHs	Retrospective cohort survey study	NA	NA	NA	NA	Retrospective after births	NA	PW	772155	No	NA	NA	NR	Medium	No helminth diagnostic tests carried out, uses DHS data, unknown anthelmintic treatment, very large retrospective survey	Yes
Zhou et al	Sex differences in the malnourished status of Chinese children due to schistosomiasis infections and inadequate dietary intake	2005	Environmental Sciences	China	schisto	Pre-Post study	NA	NA	NA	NA	7 months	R	SAC	389	No	KK	Yes	PZQ	Medium	Only infected children treated, no control group, appropriate diagnostic test	No
Ahmed et al	The nutritional impacts of soil-transmitted helminths infections among Orang Asli schoolchildren in rural Malaysia	2012	Parasites & Vectors	Malaysia	STHs	Pre-Post study	NA	NA	NA	NA	3 months	R	SAC	254	No	KK, Harada-Mori	Yes	ALB	Medium	Control group deemed unethical but un-infected or low intensity infected children compared with moderate-heavy intensity infected children, Kato-Katz and Harada-Mori faecal testing, treatment observed.	Yes
Belizario et al	School-based control of soil-transmitted helminthiasis in western Visayas, Philippines	2014	Southeast Asian Journal of Tropical Medicine & Public Health	Philippines	STHs	Pre-Post study	NA	NA	NA	NA	Baseline and after 2 years MDA	NR	SAC	1211	No	KK	Yes	MEB	Medium	Unclear if students randomly selected for sampling, secondary data used for nutritional assessment and un-specified international growth reference standards, but large sample size, Kato-Katz faecal testing	Possibly
Ben-Chetrit et al	Schistosomiasis in pregnant travelers: a case series	2015	Journal of Travel Medicine	Israel	schisto	Case series (retrospective)	NA	NA	NA	NA	Retrospective after births	NA	PW	10 (20 pregnancies, 17 live births)	Yes	ELISA serology, merthiolate–iodine– formaldehyde technique and urinalysis (test not specified)	NR	PZQ	High	Case series, small sample size, some women had remote vs recent exposure, not all women received tx and different exposure and disease risk in travellers cf women living in endemic areas	Possibly
Best et al	Treatment of intestinal parasites in Australian aboriginal children	1976	Medical Journal of Australia	Australia	STHs	Pre-Post study	NA	NA	NA	NA	4 months	NR	SAC	60	No	Direct smear, iodine for cysts and eggs, zinc sulphate flotation	Yes - but arbitrary low, medium, high	THI	High	Different treatments for different participants depending on faecal test results, varying courses of treatment, direct smear faecal testing, small sample size, some children receiving iron supplements and possible confounding due to giardiasis	No
Callender et al	Treatment effects in Trichuris dysentery syndrome	1994	Acta Paediatrica	Jamaica	STHs	Case-control	NA	NA	NA	NA	7.5 weeks (cases only), 6 and 12 months	NR	PSAC+SAC	18	Yes	KK	NR (but probably yes due to KK)	MEB	High	Small case-control study, hospital patients, Kato-Katz faecal tesing	Possibly
Cooper et al	Growth suppression in the Trichuris dysentery syndrome	1990	European Journal of Clinical Nutrition	Jamaica	STHs	Case series	NA	NA	NA	NA	4-8 months	U+R	PSAC+SAC	11	No	KK or formol-ether concentration method, colonscopy for 1 patient	Yes	MEB	High	Small case series, different diagnostic tests used on different participants without further explanation, supine length used to calculate weight for height for some patients but inappopriate given their age (standing height recommended for children >2 years old), children also received a month's worth of iron supplements at hospital discharge, potential confounder if pre-existing micronutrient de…	Possibly
Cooper et al	Catch-up' growth velocities after treatment for Trichuris dysentery syndrome	1995	Transactions of the Royal Society of Tropical Medicine & Hygiene	Jamaica	STHs	Case series	NA	NA	NA	NA	6 months	NR	PSAC+SAC	63 (includes some of the same participants as Callender et al, 1994 and Cooper et al, 1990 studies)	No	Colonoscopy	NR	MEB (post-tx series only)	High	Small case series, replication of participants from 2 previous studies, short report so limited data provided	Possibly
De Silva et al	Effect of mebendazole therapy during pregnancy on birth outcome	1999	Lancet	Sri Lanka	STHs	Cross-sectional	NA	NA	NA	NA	NA	R+U	PW	3540 (documented anthelmintic)	Yes	NA	NA	MEB	High	Data re anthelmintic treatment obtained from medical records (not certain) or participants (recall bias), LBW threshold 1kg lower than WHO universal LBW threshold, no helminth diagnostics carried out, more of a drug safety trial	Possibly
Echazu et al	Albendazole and ivermectin for the control of soil-transmitted helminths in an area with high prevalence of Strongyloides stercoralis and hookworm in northwestern Argentina: A community-based pragmatic study	2017	PLoS Neglected Tropical Diseases	Argentina	STHs	Community-based non-randomised trial	NA	NA	NA	NA	18 months	U+PU	PSAC+SAC	368	Yes	Sedimentation/concentration, agar plate culture, Harada-Mori filter paper culture, Baermann and McMaster	Yes	ALB + IVE	High	Community-based non-randomised trial, comparator group; different communities that received different deworming regime, some participants dewormed once, others 3 times, not necessarily the same cohort at start and end, number of HAZ observations within each group below minimum 400 recommended to perfom comparisons, unclear re timing of follow-up measurements	Yes
Intra et al	Multiple parasitic infestation in a nine-month-old patient: a case report	2019	Helminthologia	Italy	STHs	Case report	NA	NA	NA	NA	15 and 30 days	NR	I	1	No	Concentration method (no further details specified)	NR	MEB	High	Case report, unclear reporting of diagnostics and not much mention of growth retardation/stunting	Possibly
Kaminsky et al	Growth retardation and severe anemia in children with Trichuris dysenteric syndrome	2015	Asian Pacific Journal of Tropical Biomedicine	Honduras	STHs	Case series	NA	NA	NA	NA	NA	NR	PSAC+SAC	13	No	Direct smear	Yes	PIP/ALB/MEB/IVE	High	Small case series, only children with heavy trichuriasis enrolled, insensitive diagnostic method used (better for protozoa), only semi-quantitative diagnostic method yet used for infection intensity	Possibly
Zanwar et al	An unusual cause of overt gastrointestinal bleeding in a malnourished child	2016	Tropical Doctor	India	STHs	Case report	NA	NA	NA	NA	2 weeks	NR	SAC	1	No	Colonoscopy	No	ALB	High	Case report but clear reporting of history, presentation, symptoms, diagnosis, treatment and outcome	Possibly

## Sheet: Included studies - by age group
Authors	Title	Year	Journal	Country	Helminth type	Study design	Randomisation?	Randomisation method	Blinding?	Groups blinded	Follow up timepoints	Study setting	Population of interest	Sample size (final)	Comparator group?	Diagnostic tests	Infection intensity measured?	Anthelmintic treatment	ROB - overall grade	ROB - reasons/details	Association found between helminth infection and stunting?
Donnen et al	Vitamin A supplementation but not deworming improves growth of malnourished preschool children in eastern Zaire	1998	Journal of Nutrition	DRC	STHs	RCT	Yes	NR	NR	NR	q2weeks for 3 months, then q3months until 12 months	NR	I	311	Yes	KK	Yes	MEB	Medium	Selection bias as children in hospital for severe malnutrition initially, randomisation method not reported, nor whether there was any blinding for the interventions	No
Goto et al	Impact of anti-Giardia and anthelminthic treatment on infant growth and intestinal permeability in rural Bangladesh: a randomised double-blind controlled study	2009	Transactions of the Royal Society of Tropical Medicine & Hygiene	Bangladesh	STHs	RCT	Yes	Randomisation function in SPSS	Yes	Participants and investigators	12, 24 and 36 weeks	R	I	222	Yes	Formalin-ether faecal concentration technique	No	ALB	Medium	Randomised and double-blinded but confusion with intervention groups and treatment received so groups had to be re-assigned for analysis and not by untention to treat, sensitive but qualitative diagnostic test	No
Intra et al	Multiple parasitic infestation in a nine-month-old patient: a case report	2019	Helminthologia	Italy	STHs	Case report	NA	NA	NA	NA	15 and 30 days	NR	I	1	No	Concentration method (no further details specified)	NR	MEB	High	Case report, unclear reporting of diagnostics and not much mention of growth retardation/stunting	Possibly
Joseph et al	The Effect of Deworming on Growth in One-Year-Old Children Living in a Soil-Transmitted Helminth-Endemic Area of Peru: A Randomized Controlled Trial	2015	PLoS Neglected Tropical Diseases	Peru	STHs	RCT	Yes	Block randomisation - computer generated	Yes	Participants and investigators	6 and 12 months	R	I	1563	Yes	KK or direct smear	Yes	MEB	Medium	Randomisation, double-blind, large and appropriate sample size, control group, treatment observed, less sensitive diagnostic faecal test used for children receiving placebo as part of trial compared to those receiving deworming treatment, compliance issues as about 25% of participants received deworming from outside the trial during study period	No
Awasthi et al	Effectiveness and cost-effectiveness of albendazole in improving nutritional status of pre-school children in urban slums	2000	Indian Pediatrics	India	STHs	RCT	Yes	Participants allocated a serial number (odd/non-zero ending placebo group, rest tx group)	Yes	Participants only	2 years	U	PSAC	1045	Yes	Direct smear	No	ALB	Medium	Only single blinding so some children offered ABZ instead of placebo by project workers at each tx stage, calcium placebo could potentially have affected growth, direct smear faecal method, large sample size	No
Dossa et al	Impact of iron supplementation and deworming on growth performance in preschool Beninese children	2001	European Journal of Clinical Nutrition	Benin	STHs	RCT	Yes	NR	Yes	Participants and investigators	1, 3 and 10 months	R	PSAC	140	Yes	Direct smear, Kato's concentration method	Yes	ALB	Medium	Randomised but method not reported, abstract states double-blind but no further details, combination of direct smear and Kato concentration method used (direct smear poor diagnostic test for helminth eggs), short trial (3 months) but follow up 7 months later, treatment observed	No
Garg et al	Evaluation of the Integrated Management of Childhood Illness guidelines for treatment of intestinal helminth infections among sick children aged 2-4 years in western Kenya	2002	Transactions of the Royal Society of Tropical Medicine & Hygiene	Kenya	STHs	RCT	Yes	Computer-generated random number list	Yes	Lab staff and investigators at 6 month follow-up, unclear re participants	6 months	NR	PSAC	347	Yes	Formol-ethyl acetate concentration method	No	MEB	Medium	Selection bias as sick pre-school children enrolled, then only those without palmar pallor randomised for trial, good sensitivity qualitative diagnostic test used, treatment observed, control group	Possibly
Gupta et al	Effect of periodic antiascaris and antigiardia treatment on nutritional status of preschool children	1982	American Journal of Clinical Nutrition	Guatemala	STHs	RCT	Yes	NR	Yes	Participants only	12 months	R	PSAC	159	Yes	Formol-ether concentration method	No	PIP	Low	Randomised, control group, participants blinded, sensitive diagnostic test used, treatment observed, possible confounding by giardiasis	No
Halpenny et al	Regional, household and individual factors that influence soil transmitted helminth reinfection dynamics in preschool children from rural indigenous Panama	2013	PLoS Neglected Tropical Diseases	Panama	STHs	Pre-Post study	NA	NA	NA	NA	3, 9 and 16 months	R	PSAC	215	Yes	KK, FLOTAC	Yes	ALB	Medium	Children living in extreme poverty enrolled, sensitive diagnostic tests, treatment observed	No
Northrop-Clewes et al	Anthelmintic treatment of rural Bangladeshi children: effect on host physiology, growth, and biochemical status	2001	American Journal of Clinical Nutrition	Bangladesh	STHs	RCT	Yes	Household numbers from clinic records (randomised by village)	Yes	Participants and investigators	2, 4, 6, 8 and 12 months	R	PSAC	117	Yes	Modified ether sedimentation technique	Yes	PP + MEB	Low	Randomised by village, double-blind, control group, long follow up	No
Osakunor et al	Dynamics of paediatric urogenital schistosome infection, morbidity and treatment: a longitudinal study among preschool children in Zimbabwe	2018	BMJ Global Health	Zimbabwe	schisto	Pre-Post study	NA	NA	NA	NA	3 and 12 months	R	PSAC	156	Yes	Urine filtration method, KK	Yes	PZQ	Medium	Only infected children treated, small sample size, appropriate diagnostics	Yes
Shield et al	Intestinal helminthiasis and nutritional status including iron, zinc and copper in Papua New Guinea urban children aged 1 to 5 years and effect of anthelmintic intervention	1986	Papua New Guinea Medical Journal	PNG	STHs	Pre-Post study	NA	NA	NA	NA	3, 6 and 8 months	U	PSAC	281?	Yes	Harada-Mori culture, direct smears and McMaster	Yes	PP, MEB + THI	Medium	Only infected children treated, small sample size, appropriate diagnostics but some combined egg count data, malaria possible confounder	No
Callender et al	Treatment effects in Trichuris dysentery syndrome	1994	Acta Paediatrica	Jamaica	STHs	Case-control	NA	NA	NA	NA	7.5 weeks (cases only), 6 and 12 months	NR	PSAC+SAC	18	Yes	KK	NR (but probably yes due to KK)	MEB	High	Small case-control study, hospital patients, Kato-Katz faecal tesing	Possibly
Cooper et al	Growth suppression in the Trichuris dysentery syndrome	1990	European Journal of Clinical Nutrition	Jamaica	STHs	Case series	NA	NA	NA	NA	4-8 months	U+R	PSAC+SAC	11	No	KK or formol-ether concentration method, colonscopy for 1 patient	Yes	MEB	High	Small case series, different diagnostic tests used on different participants without further explanation, supine length used to calculate weight for height for some patients but inappopriate given their age (standing height recommended for children >2 years old), children also received a month's worth of iron supplements at hospital discharge, potential confounder if pre-existing micronutrient de…	Possibly
Cooper et al	Catch-up' growth velocities after treatment for Trichuris dysentery syndrome	1995	Transactions of the Royal Society of Tropical Medicine & Hygiene	Jamaica	STHs	Case series	NA	NA	NA	NA	6 months	NR	PSAC+SAC	63 (includes some of the same participants as Callender et al, 1994 and Cooper et al, 1990 studies)	No	Colonoscopy	NR	MEB (post-tx series only)	High	Small case series, replication of participants from 2 previous studies, short report so limited data provided	Possibly
Echazu et al	Albendazole and ivermectin for the control of soil-transmitted helminths in an area with high prevalence of Strongyloides stercoralis and hookworm in northwestern Argentina: A community-based pragmatic study	2017	PLoS Neglected Tropical Diseases	Argentina	STHs	Community-based non-randomised trial	NA	NA	NA	NA	18 months	U+PU	PSAC+SAC	368	Yes	Sedimentation/concentration, agar plate culture, Harada-Mori filter paper culture, Baermann and McMaster	Yes	ALB + IVE	High	Community-based non-randomised trial, comparator group; different communities that received different deworming regime, some participants dewormed once, others 3 times, not necessarily the same cohort at start and end, number of HAZ observations within each group below minimum 400 recommended to perfom comparisons, unclear re timing of follow-up measurements	Yes
Efunshile, A M	School based mass de-worming initiative in South-West Nigeria	2017	African Journal of Clinical and Experimental Microbiology	Nigeria	STHs	Pre-Post study	NA	NA	NA	NA	6 months	U	PSAC+SAC	957	No	Direct microscopy	No	ALB	Medium	Direct microscopy faecal exams (poor sensitivity for helminth eggs, better for protozoa or helminth larvae), considered unethical to have a control group so divided children unto unfected vs un-infected at baseline and all treated, high prevalence levels reported despite use if insensitive diagnostic tests (possible under-reporting)	No
Forrester et al	Randomised trial of albendazole and pyrantel in symptomless trichuriasis in children	1998	Lancet	Mexico	STHs	Randomised trial	Yes	Block randomisation	Yes	Participants and investigators	4, 8 and 12 months	U	PSAC+SAC	508	Yes	KK	Yes	ALB + PP	Low	Randomised and double-blinded with 3 different interventions groups but control group deemed unethical, kato katz faecal testing, reasonable follow-up time, treatment observed, concerns re possible adverse/toxic effects in high dose albendazole intervention group	Possibly
Greenberg et al	Single dose piperazine therapy for Ascaris lumbricoides: an unsuccessful method of promoting growth	1981	American Journal of Clinical Nutrition	Bangladesh	STHs	RCT	Yes	NR	Yes	Participants and investigators	6 and 11 months	U	PSAC+SAC	152	Yes	Direct smear, merthiolate iodine formalin solution (to stain and preserve parasite eggs)	Yes	PIP	Low	Randomised, double-blind, control group but insensitive diagnostic test used (more useful for protozoa)	No
Hlaing, T	The effect of targeted chemotherapy against ascariasis on the height of children in rural Myanmar	1994	Transactions of the Royal Society of Tropical Medicine and Hygiene	Myanmar	STHs	RCT	Yes	NR	NR	NR	6, 12, 18, 24 months	R	PSAC+SAC	218	Yes	NR	NR	LEV	Medium	Short report so limited data, sub-group of previous study participants (Thein et al, 1991), unclear whether placebo or no treatment for control group, diagnostic test not reported	Possibly
Kaminsky et al	Growth retardation and severe anemia in children with Trichuris dysenteric syndrome	2015	Asian Pacific Journal of Tropical Biomedicine	Honduras	STHs	Case series	NA	NA	NA	NA	NA	NR	PSAC+SAC	13	No	Direct smear	Yes	PIP/ALB/MEB/IVE	High	Small case series, only children with heavy trichuriasis enrolled, insensitive diagnostic method used (better for protozoa), only semi-quantitative diagnostic method yet used for infection intensity	Possibly
Kightlinger et al	Ascaris lumbricoides aggregation in relation to child growth status, delayed cutaneous hypersensitivity, and plant anthelmintic use in Madagascar	1996	Journal of Parasitology	Madagascar	STHs	Pre-Post study	NA	NA	NA	NA	12 months	R	PSAC+SAC	550	No	Formalin-detergent sedimentation method	Yes	MEB + PP	Medium	Very high helminth prevalence and heavy intensity infections at baseline, diagnostic test can be used for semi-quantitative results as in this case, long follow-up period but potentially high risk of re-infection	No
McGarvey et al	Schistosomiasis japonica and childhood nutritional status in northeastern Leyte, the Philippines: a randomized trial of praziquantel versus placebo	1996	American Journal of Tropical Medicine & Hygiene	Philippines	schisto	RCT	Yes	Random numbers	Yes	Participants and investigators	6 months	R	PSAC+SAC	170	Yes	KK	Yes	PZQ	Low	Only infected children enrolled, very wide age range, randomised and double-blind, treatment observed, relatively short follow-up	No
Rousham et al	An 18-month study of the effect of periodic anthelminthic treatment on the growth and nutritional status of pre-school children in Bangladesh	1994	Annals of Human Biology	Bangladesh	STHs	RCT	Yes	NR (randomised by village)	NR	NR	18 months	R	PSAC+SAC	1402	Yes	Modified sedimentation technique	Yes	MEB	Low	Randomisation by village, large sample size, appropriate diagnostic test, control group	No
Sarkar et al	Effect of deworming on nutritional status of Ascaris infested slum children of Dhaka, Bangladesh	2002	Indian Pediatrics	Bangladesh	STHs	RCT	Yes	Random number table	Yes	Participants and investigators	4 months	U	PSAC+SAC	81	Yes	Direct smear	No	PP	Medium	Only infected children enrolled, brief report rather than full article so limited data, insensitive diagnostic test used, small sample size, relatively short follow-up	No
Stephenson et al	Relationships between Ascaris infection and growth of malnourished preschool children in Kenya	1980	American Journal of Clinical Nutrition	Kenya	STHs	Pre-Post study	NA	NA	NA	NA	14 and 28 weeks	R	PSAC+SAC	290	Yes	Modified Telemann's method	No	LEV	Medium	Unclear re sensitivity of diagnostic tests used, reasonable follow-up period	No
Stoltzfus et al	Low dose daily iron supplementation improves iron status and appetite but not anemia, whereas quarterly anthelminthic treatment improves growth, appetite and anemia in Zanzibari preschool children	2004	Journal of Nutrition	Tanzania	STHs	RCT	Yes	Block randomisation (randomised by household)	Yes	Participants and investigators	12 months	R	PSAC+SAC	459	Yes	KK	Yes	MEB	Low	Randomised by household, double-blind, large sample size, appropriate diagnostic test, treatment observed, possible malaria confounder	No
Tanner et al	Longitudinal study on the health status of children in a rural Tanzanian community: parasitoses and nutrition following control measures against intestinal parasites	1987	Acta Tropica	Tanzania	STHs + schisto	Community-based non-randomised trial	NA	NA	NA	NA	6 and 18 months	R	PSAC+SAC	170	Yes	Urine filtration and dipstick, KK, agar plate culture, merthiolate-iodine-formalin method mainly for protozoa	NR	ALB	Medium	Long follow-up, anthelmintic treatment not give as a sole intervention at any stage, sensitive combination if diagnostic tests, malaria possible confounder	No
Willett et al	Ascaris and growth rates: a randomized trial of treatment	1979	American Journal of Public Health	Tanzania	STHs	RCT	Yes	Random number table	Yes	Participants and investigators	12 months	R	PSAC+SAC	273	Yes	Modified formol-ether concentration technique	Yes	LEV	Low	Randomised, double-blind, appropriate diagnostic test, treatment observed, relatively long follow-up	No
Abudho et al	Evaluation of morbidity in Schistosoma mansoni-positive primary and secondary school children after four years of mass drug administration of praziquantel in western Kenya	2020	Infectious Diseases of Poverty	Kenya	schisto + STHs	Pre-Post study	Yes	NR	NA	NA	Baseline and 5 years later (after 4 years MDA)	R	SAC	69 (year 5)	No	KK	Yes, for S. mansoni only	PZQ + ALB	Medium	Only S. mansoni positive children enrolled and assessed, Kato-Katz faecal testing, no comparator group, treatment observed, malaria possible confounder	No
Ahmed et al	The nutritional impacts of soil-transmitted helminths infections among Orang Asli schoolchildren in rural Malaysia	2012	Parasites & Vectors	Malaysia	STHs	Pre-Post study	NA	NA	NA	NA	3 months	R	SAC	254	No	KK, Harada-Mori	Yes	ALB	Medium	Control group deemed unethical but un-infected or low intensity infected children compared with moderate-heavy intensity infected children, Kato-Katz and Harada-Mori faecal testing, treatment observed.	Yes
Assis et al	Schistosoma mansoni infection and nutritional status in schoolchildren: a randomized, double-blind trial in northeastern Brazil	1998	American Journal of Clinical Nutrition	Brazil	schisto	RCT	Yes	NR	Yes	Participants and investigators	6 and 12 months	U	SAC	353	Yes	KK	Yes (but only light-moderate included)	OXA	Low	Only light-moderately infected children enrolled but control group, repeat faecal samples checked if 1st faecal sample positive	No
Beach et al	Assessment of combined ivermectin and albendazole for treatment of intestinal helminth and Wuchereria bancrofti infections in Haitian schoolchildren	1999	American Journal of Tropical Medicine & Hygiene	Haiti	STHs	RCT	Yes	random number table	Yes	Participants and investigators	5 weeks, 4 months, 1 year	U	SAC	853	Yes	Modified Stoll method	Yes	ALB + IVE	Low	Modified Stoll faecal testing but large sample size, double-blind, randomised and treatment observed	No
Befidi-Mengue et al	The impact of Schistosoma haematobium infection and of praziquantel treatment on the growth of primary school children in Bertoua, Cameroon	1992	Journal of Tropical Medicine & Hygiene	Cameroon	schisto + STHs	RCT	Yes (but according to intensity of infection)	NR	Yes	Participants and investigators	6 months	U	SAC	653	Yes	Sedimentation and wet mount, Ames dipstick reagent strips (urine), direct smear (faeces)	Yes	PZQ	Medium	Randomised after stratified according to infection intensity, only male students eligible for study, double-blind intervention, malaria potential confounder	No
Belizario et al	School-based control of soil-transmitted helminthiasis in western Visayas, Philippines	2014	Southeast Asian Journal of Tropical Medicine & Public Health	Philippines	STHs	Pre-Post study	NA	NA	NA	NA	Baseline and after 2 years MDA	NR	SAC	1211	No	KK	Yes	MEB	Medium	Unclear if students randomly selected for sampling, secondary data used for nutritional assessment and un-specified international growth reference standards, but large sample size, Kato-Katz faecal testing	Possibly
Best et al	Treatment of intestinal parasites in Australian aboriginal children	1976	Medical Journal of Australia	Australia	STHs	Pre-Post study	NA	NA	NA	NA	4 months	NR	SAC	60	No	Direct smear, iodine for cysts and eggs, zinc sulphate flotation	Yes - but arbitrary low, medium, high	THI	High	Different treatments for different participants depending on faecal test results, varying courses of treatment, direct smear faecal testing, small sample size, some children receiving iron supplements and possible confounding due to giardiasis	No
Coutinho et al	Nutritional status improves after treatment of schistosoma japonicum-infected children and adolescents	2006	Journal of Nutrition	Philippines	schisto	Pre-Post study	NA	NA	NA	NA	4 weeks, then q3months until 18 months	R	SAC	477	No	KK, PCR for hookworm species	Yes	PZQ	Medium	Only infected children included in study but 3 stool samples checked prior to enrollment, Tanner staging performed to account for puberty, PCR testing to distinguish hookworm species, wide age range of participants (some technically adults)	Possibly
Degarege et al	Association between intestinal helminth infections and underweight among school children in Tikur Wuha Elementary School, Northwestern Ethiopia	2013	Journal of Infection and Public Health	Ethiopia	STHs + schisto	Pre-Post study	NA	NA	NA	NA	4 weeks	R	SAC	403	No	KK and concentration method	Yes	ALB + PZQ	Medium	Only infected children treated, very short follow-up time, no comparator group	No
Fernando et al	Geo-helminth infections in a rural area of Sri Lanka	2001	Southeast Asian Journal of Tropical Medicine and Public Health	Sri Lanka	STHs	Pre-Post study	NA	NA	NA	NA	12 and 24 months	R	SAC	349	Yes	Direct saline smears	No	MEB	Medium	Low sensitivity diagnostic test, nutritional status better at baseline in infected children than un-infected, over-the-counter anthelmintics widely available in the study area so may have influenced prevalence levels	No
Hadju et al	Relationships between soil-transmitted helminthiases and growth in urban slum schoolchildren in Ujung Pandang, Indonesia	1997	International Journal of Food Sciences & Nutrition	Indonesia	STHs	RCT	Yes	based on sex and A.lumbricoides egg count	Yes	Participants and investigators	3, 6 and 12 months	U	SAC	330	Yes	Modified KK	Yes	ALB + PP	Medium	Randomised but based on sex and helminth egg count, double-blind, control group, kato-katz faecal testing	Yes
Hadju et al	Improvements of growth, appetite, and physical activity in helminth-infected schoolboys 6 months after single dose of albendazole	1998	Asia Pacific Journal of Clinical Nutrition	Indonesia	STHs	Controlled trial	No	NA	NR	NR	6 months	U	SAC	129	Yes	Modified KK	Yes	ALB	Medium	Not randomised, only boys enrolled, all children infected at baseline, unclear whether any blinding, control group, kato-katz diagnostic testing	Possibly
Hagel et al	Helminthic infection and anthropometric indicators in children from a tropical slum: Ascaris reinfection after anthelmintic treatment	1999	Journal of Tropical Pediatrics	Venezuela	STHs	Pre-Post study	NA	NA	NA	NA	12 months, then 8 month check for re-infection	U	SAC	154	Yes	MIFC	No	OP/PP	Medium	Placebo control group deemed unethical but sub-group of un-infected children acted as a control group, unclear regarding specific parasitological diagnostic test used but likely insensitive from methods described, but serial stool samples collected	Possibly
Hesham Al-Mekhlafi et al	Pattern and predictors of soil-transmitted helminth reinfection among aboriginal schoolchildren in rural Peninsular Malaysia	2008	Acta Tropica	Malaysia	STHs	Pre-Post study	NA	NA	NA	NA	3 and 6 months	R	SAC	120	Yes	Modified cellophane thick smear (KK), Harada-Mori	Yes	ALB	Medium	Sensitive diagnostic test combination, treatment observed, uses p-value of 0.2 as elimination criterion for univariate and multiple logistic regression (instead of usual 0.05)	No
Humphries et al	Effectiveness of albendazole for hookworm varies widely by community and correlates with nutritional factors: A cross-sectional study of school-age children in Ghana	2017	American Journal of Tropical Medicine and Hygiene	Ghana	STHs	Pre-Post study	NA	NA	NA	NA	10-14 days	NR	SAC	76	No	KK	Yes	ALB	Medium	Only hookworm infected children treated, very short follow-up (drug efficacy trial), reasonable diagnostic test although timing important for hookworm egg detection, treatment observed	No
Hurlimann et al	Effect of deworming on school-aged children's physical fitness, cognition and clinical parameters in a malaria-helminth co-endemic area of Cote d'Ivoire	2014	BMC Infectious Diseases	Côte d'Ivoire	STHs + schisto	Pre-Post Study	NA	NA	NA	NA	5 months	R	SAC	213	Yes	KK, urine filtration	Yes	ALB + PZQ	Medium	Relatively short follow-up period, appropriate diagnostics, possible confounding by malaria/giardiasis	No
Jinabhai et al	Epidemiology of helminth infections: implications for parasite control programmes, a South African perspective	2001	Public Health Nutrition	South Africa	STHs + schisto	RCT	Yes	NR	NR	NR	2 and 16 weeks	R	SAC	268	Yes	Direct smear, urine filtration	Yes	ALB + PZQ	Medium	Randomisation but blinding not reported, unclear diagnostic faecal testing, methods incorrectly describe weight-for-age as a measure of wasting	No
Jinabhai et al	A randomized controlled trial of the effect of antihelminthic treatment and micronutrient fortification on health status and school performance of rural primary school children	2001	Annals of Tropical Paediatrics	South Africa	STHs + schisto	RCT	Yes	NR	Yes	Participants and investigators	16 weeks	R	SAC	579	Yes	Direct smear, urine filtration	Yes	ALB + PZQ	Medium	Randomised and double-blind but unclear diagnostic faecal test and incorrect infection intensity categories provided for S.haematobium, relatively short follow-up but limited by school term length, control group, possible confounding due to micronutritent status and supplements	No
Kruger et al	Effects of iron fortification in a school feeding scheme and anthelmintic therapy on the iron status and growth of six- to eight-year-old schoolchildren	1996	Food and Nutrition Bulletin	South Africa	STHs	RCT	Yes	NR	NR	NR	6 and 11 months	U+R	SAC	134	Yes	Direct smear	No	ALB	Medium	Randomised, blinding not reported, insensitive diagnostic test for helminths, treatment observed, possible confounding due to micronutrient supplementation	No
Lai et al	Ascaris and Trichuris do not contribute to growth retardation in primary school children	1995	Southeast Asian Journal of Tropical Medicine & Public Health	Malaysia	STHs	RCT	Yes	Block randomisation and even/odd ending numbers	Yes	Participants only	6, 12, 18 and 24 months	U+PU	SAC	353	Yes	Stoll dilution technique	Yes	MEB + PP	Low	Randomised, single-blind, quantitative and appropriate diagnostic test used, treatment observed, control group and 3 stool samples checked at enrollment	No
Liu et al	Effect of deworming on indices of health, cognition, and education among schoolchildren in rural China: A cluster-randomized controlled trial	2017	American Journal of Tropical Medicine and Hygiene	China	STHs	RCT	Yes	Randomisation by township (cluster), computerised random sequence generator	No	NA	6 and 11 months	R	SAC	2028	Yes	KK	Yes	ALB	Low	Randomisation by township, control group received no intervention (not a placebo), no explicit blinding but control group not aware they were part of a trial, large sample size, 2 faecal samples collected from consecutive days, appropriate diagnostic test, treatment not observed	No
Longfils et al	Weekly iron and folic acid supplementation as a tool to reduce anemia among primary school children in Cambodia	2005	Nutrition Reviews	Cambodia	STHs	Cluster intervention study	NA	NA	NA	NA	12 months	R	SAC	412	Yes	KK, sodium-acetate-acetic-formalin (SAF) method, Baermann	Yes	MEB	Medium	Pre-post cluster study, discrepencies and confusion regarding accurate age of children, combination of sensitive diagnostic tests, possible confounding from micronutrient deficiency and supplements	No
S Mahendra Raj	Intestinal geohelminthiasis and growth in pre-adolescent primary school children in Northeastern Peninsular Malaysia	1998	Southeast Asian Journal of Tropical Medicine & Public Health	Malaysia	STHs	Pre-Post study	No	NA	No	NA	12 months	U	SAC	98	Yes	Modified Stoll count	Yes	ALB	Medium	High baseline prevalence, only infected children treated, appropriate diagnostic test	No
KF Michaelsen	Hookworm infection in Kweneng District, Botswana, A prevalence survey and a controlled treatment trial	1985	Transactions of the Royal Society of Tropical Medicine & Hygiene	Botswana	STHs	RCT	Yes	NR	NR	NR	2 weeks, 5 months	R	SAC	195	Yes	Brine flotation method, Stoll's technique, test-tube hatching for species identification	Yes	TET	Low	Randomised, blinding not reported, different anthelmintic used compared with most studies, relatively short follow-up, appropriate diagnostic tests	No
Nga et al	Decreased parasite load and improved cognitive outcomes caused by deworming and consumption of multi-micronutrient fortified biscuits in rural Vietnamese schoolchildren	2011	American Journal of Tropical Medicine and Hygiene	Vietnam	STHs	RCT	Yes	Block randomisation using computer-generated list	Yes	Participants and investigators	2 and 4 months	R	SAC	482	Yes	KK	Yes	ALB	Low	Randomised, double-blind, appropriate sample size and diagnostic test	No
Nokes et al	Evidence for an improvement in cognitive function following treatment of Schistosoma japonicum infection in Chinese primary schoolchildren	1999	American Journal of Tropical Medicine & Hygiene	China	STHs + schisto	RCT	Yes	NR	Yes	Participants and investigators	3 months	NR	SAC	181	Yes	KK	Yes	ALB + PZQ	Medium	Only infected children recruited, relatively short follow-up time, randomised, double-blind, appropriate sample size and diagnostic test	No
Ostwald et al	The effect of intestinal parasites on nutritional status in well-nourished school-age children in the highlands of Papua New Guinea	1984	Nutrition Reports International	PNG	STHs	RCT	Yes	coin toss	NR	NR	2 and 5 months	R	SAC	87	Yes	Concentrated saline dilutions and McMaster	Yes	MEB	Medium	Small sample size, control group un-treated (not placebo), randomisation, appropriate diagnostic test	No
Simeon et al	Treatment of Trichuris trichiura infections improves growth, spelling scores and school attendance in some children	1995	Journal of Nutrition	Jamaica	STHs	RCT	Yes	Random number table	NR	NR	6 months	U+R	SAC	392	Yes	KK	Yes	ALB	Medium	Randomised, appropriate diagnostic test, relatively short follow-up	No
Sircar et al	Schistosoma mansoni Mass Drug Administration Regimens and Their Effect on Morbidity among Schoolchildren over a 5-Year Period-Kenya, 2010-2015	2018	American Journal of Tropical Medicine & Hygiene	Kenya	STHs + schisto	Pre-Post study	NA	NA	NA	NA	1, 3 and 5 years	R	SAC	512 (year 5)	Yes	KK	Yes (for S. mansoni only)	PZQ + ALB	Medium	Long follow-up period to evaluate MDA, appropriate diagnostic test, large sample size, comparing school-based deworming group with community-based deworming group	No
Staudacher et al	Soil-transmitted helminths in southern highland Rwanda: associated factors and effectiveness of school-based preventive chemotherapy	2014	Tropical Medicine & International Health	Rwanda	STHs	Pre-Post study	NA	NA	NA	NA	2 and 15 weeks	R+U	SAC	510	Yes	KK, real-time PCR for A. lumbricoides, 10% checked by formalin-ethyl acetate microscopy	Yes	MEB	Medium	Very short follow-up evaluating MDA efficacy, appropriate diagnostic tests (PCR very sensitive), large sample size	Yes
Stephenson et al	Relationships of Schistosoma haematobium, hookworm and malarial infections and metrifonate treatment to growth of Kenyan school children	1985	American Journal of Tropical Medicine & Hygiene	Kenya	STHs + schisto	RCT	Yes	NR	NR	NR	6 months	NR	SAC	399	Yes	Modified KK, nuclepore filter method for S. haematobium	Yes	MET	Medium	Only infected children enrolled, randomised, large sample size, appropriate diagnostic tests, control group, possible malaria confounder	No
Stephenson et al	Single dose metrifonate or praziquantel treatment in Kenyan children. II. Effects on growth in relation to Schistosoma haematobium and hookworm egg counts	1989	American Journal of Tropical Medicine & Hygiene	Kenya	STHs + schisto	Controlled trial	NA	NA	NR	NR	8 months	NR	SAC	312	Yes	NR	Yes	PZQ/MET	Medium	Unclear re allocation to intervention groups but not randomised, reasonable follow-up period, diagnostic tests not reported, large sample size	No
Stephenson et al	Treatment with a single dose of albendazole improves growth of Kenyan schoolchildren with hookworm, Trichuris trichiura, and Ascaris lumbricoides infections	1989	American Journal of Tropical Medicine & Hygiene	Kenya	STHs	RCT	Yes	NR	Yes	Investigators only?	6 months	NR	SAC	150	Yes	Modified KK	Yes	ALB	Medium	Randomised, small sample size, appropriate diagnostic test, relatively short follow-up, treatment observed	Yes
Stephenson et al	Physical fitness, growth and appetite of Kenyan school boys with hookworm, Trichuris trichiura and Ascaris lumbricoides infections are improved four months after a single dose of albendazole	1993	Journal of Nutrition	Kenya	STHs	RCT	Yes	By descending hookworm egg count?	Yes	Investigators only?	4 months	NR	SAC	53	Yes	Modified KK	Yes	ALB	Medium	Only boys enrolled, small sample size, randomised according to hookworm egg counts, appropriate diagnostic test (although less sensitive for hookworm eggs)	Yes
Stoltzfus et al	School-based deworming program yields small improvement in growth of Zanzibari school children after one year	1997	Journal of Nutrition	Tanzania	STHs	RCT	Yes	NR (randomised by district)	NR	NR	12 months	NR	SAC	3063	Yes	KK, hemastix test strips for urine (microhaematuria used as a proxy indicator for S. haematobium)	Yes	MEB	Medium	Randomised by district, control group, large sample size, appropriate faecal diagnostic test, potentially less sensitive urinary diagnostic test	Yes
Taylor et al	The effect of different anthelmintic treatment regimens combined with iron supplementation on the nutritional status of schoolchildren in KwaZulu-Natal, South Africa: a randomized controlled trial	2001	Transactions of the Royal Society of Tropical Medicine & Hygiene	South Africa	STHs + schisto	RCT	Yes	NR	Yes	Participants and investigators	6 and 12 months	R	SAC	275	Yes	Formol-ether concentration method, Ecur dipstick test on urine	NR	ALB + PZQ	Low	Randomised, double-blind, sensitive diagnostic tests (Ecur possibly less so), long follow-up time, treatment observed	No
Tee et al	Growth reduction among primary schoolchildren with light trichuriasis in Malaysia treated with albendazole	2013	Southeast Asian Journal of Tropical Medicine & Public Health	Malaysia	STHs	RCT	Yes	Randomisation software	NR	NR	3, 6 and 12 months	R	SAC	33	Yes	Modified Stoll's concentration technique	Yes	ALB	Medium	Only infected children enrolled, randomised, small sample size, relatively long follow-up, appropriate diagnostic tests but no repeat stool samples collected	No
Thein et al	A controlled chemotherapeutic intervention trial on the relationship between Ascaris lumbricoides infection and malnutrition in children	1991	Transactions of the Royal Society of Tropical Medicine & Hygiene	Myanmar	STHs	RCT	Yes	NR (randomised by village)	NA	NA	6 and 12 months	PU	SAC	2439	Yes	Direct smear	NR	LEV	Medium	Randomised by village, control group, long follow-up, insensitive diagnostic test, large sample size	Possibly
Watkins & Pollitt	Effect of removing Ascaris on the growth of Guatemalan schoolchildren	1996	Pediatrics	Guatemala	STHs	RCT	Yes	NR	Yes	Participants and investigators	12 and 24 weeks	NR	SAC	228	Yes	KK	Yes	ALB	Low	Randomised, double-blind, appropriate diagnostic test, relatvely short follow-up	No
Yap et al	Effect of deworming on physical fitness of school-aged children in Yunnan, China: a double-blind, randomized, placebo-controlled trial	2014	PLoS Neglected Tropical Diseases	China	STHs	RCT	Yes	Block randomisation	Yes	Participants and investigators	1, 4 and 6 months	R	SAC	194	Yes	KK, Baermann	Yes	ALB	Low	Randomised, double-blind, relatively short follow-up, treatment observed, appropriate diagnostic test combination	No
Zanwar et al	An unusual cause of overt gastrointestinal bleeding in a malnourished child	2016	Tropical Doctor	India	STHs	Case report	NA	NA	NA	NA	2 weeks	NR	SAC	1	No	Colonoscopy	No	ALB	High	Case report but clear reporting of history, presentation, symptoms, diagnosis, treatment and outcome	Possibly
Zhou et al	Sex differences in the malnourished status of Chinese children due to schistosomiasis infections and inadequate dietary intake	2005	Environmental Sciences	China	schisto	Pre-Post study	NA	NA	NA	NA	7 months	R	SAC	389	No	KK	Yes	PZQ	Medium	Only infected children treated, no control group, appropriate diagnostic test	No
Ben-Chetrit et al	Schistosomiasis in pregnant travelers: a case series	2015	Journal of Travel Medicine	Israel	schisto	Case series (retrospective)	NA	NA	NA	NA	Retrospective after births	NA	PW	10 (20 pregnancies, 17 live births)	Yes	ELISA serology, merthiolate–iodine– formaldehyde technique and urinalysis (test not specified)	NR	PZQ	High	Case series, small sample size, some women had remote vs recent exposure, not all women received tx and different exposure and disease risk in travellers cf women living in endemic areas	Possibly
De Silva et al	Effect of mebendazole therapy during pregnancy on birth outcome	1999	Lancet	Sri Lanka	STHs	Cross-sectional	NA	NA	NA	NA	NA	R+U	PW	3540 (documented anthelmintic)	Yes	NA	NA	MEB	High	Data re anthelmintic treatment obtained from medical records (not certain) or participants (recall bias), LBW threshold 1kg lower than WHO universal LBW threshold, no helminth diagnostics carried out, more of a drug safety trial	Possibly
Larocque et al	A double-blind randomized controlled trial of antenatal mebendazole to reduce low birthweight in a hookworm-endemic area of Peru	2006	Tropical Medicine & International Health	Peru	STHs	RCT	Yes	Computer-generated randomly ordered blocks	Yes	Participants and investigators	Baseline (2nd trimester), 3rd trimester and delivery	R+PU	PW	950	Yes	KK	Yes	MEB	Low	Randomised, double-blind, large sample size, appropriate diagnostic test	Possibly
Ndibazza et al	Effects of deworming during pregnancy on maternal and perinatal outcomes in Entebbe, Uganda: a randomized controlled trial	2010	Clinical Infectious Diseases	Uganda	STHs + schisto	RCT	Yes	Block randomisation using Stata	Yes	Participants and investigators	at delivery and 14 weeks after delivery	PU+R	PW	2289	Yes	KK, charcoal culture for S. strongyloides	Yes	ALB + PZQ	Low	Randomised, double-blinded, large sample size, appropriate diagnostic tests	Possibly
Passerini et al	Increased birth weight associated with regular pre-pregnancy deworming and weekly iron-folic acid supplementation for Vietnamese women	2012	PLoS Neglected Tropical Diseases	Vietnam	STHs	Controlled trial	NA	NA	NA	NA	at delivery	R	PW	463	Yes	NA	NA	ALB	Medium	No randomisation, control hospital women were un-treated (no placebo), appropriate sample size but no diagnostic testing for helminths	Yes
Satya Deepti et al	Effects of deworming during pregnancy on maternal and perinatal outcomes: A randomized controlled trial	2015	Research Journal of Pharmaceutical, Biological and Chemical Sciences	India	STHs	RCT	Yes	Block randomisation using Stata	Yes	Participants and investigators	At delivery and then within 14 weeks of delivery	PU+R	PW	408	Yes	NR	Yes	ALB + MEB	Medium	Randomised, double-blind, large sample size, diagnostic test not reported but stool samples collected, treatment oberved	No
Walia et al	Routine deworming during antenatal care decreases risk of neonatal mortality and low birthweight: A retrospective cohort of survey data	2021	PLoS Neglected Tropical Diseases	Multi-country (56)	STHs	Retrospective cohort survey study	NA	NA	NA	NA	Retrospective after births	NA	PW	772155	No	NA	NA	NR	Medium	No helminth diagnostic tests carried out, uses DHS data, unknown anthelmintic treatment, very large retrospective survey	Yes
Akpan et al	Antenatal Deworming and Materno-Perinatal Outcomes in Calabar, Nigeria	2018	Macedonian Journal of Medical Sciences	Nigeria	STH's	RCT	Yes	Computer-generated random numbers	Yes	Participants and investigators	At delivery	NA	PW	530	Yes	NA	NA	MEB	Low	Randomised, double-blind, treatment observed, reasonable sample size, helminths not diagnosed	No
Mofid et al	A Double-Blind Randomized Controlled Trial of Maternal Postpartum Deworming to Improve Infant Weight Gain in the Peruvian Amazon	2017	PLoS Neglected Tropical Diseases	Peru	STHs	RCT	Yes	Computer-generated random number sequence	Yes	Particpants and investigators	1 and 6 months	NR	BFW	968	Yes	KK, direct smear and ethyl-ether concentration method on stored samples after 6 months	Yes	ALB	Low	Randomised, double-blinded, large sample size, appropriate diagnostic tests	Possibly

## Sheet: Included studies - alphabetical
Authors	Title	Year	Journal	Country	Helminth type	Study design	Randomisation?	Randomisation method	Blinding?	Groups blinded	Follow up timepoints	Study setting	Population of interest	Sample size (final)	Comparator group?	Diagnostic tests	Infection intensity measured?	Anthelmintic treatment	ROB - overall grade	ROB - reasons/details	Association found between helminth infection and stunting?
Abudho et al	Evaluation of morbidity in Schistosoma mansoni-positive primary and secondary school children after four years of mass drug administration of praziquantel in western Kenya	2020	Infectious Diseases of Poverty	Kenya	schisto + STHs	Pre-Post study	Yes	NR	NA	NA	Baseline and 5 years later (after 4 years MDA)	R	SAC	69 (year 5)	No	KK	Yes, for S. mansoni only	PZQ + ALB	Medium	Only S. mansoni positive children enrolled and assessed, Kato-Katz faecal testing, no comparator group, treatment observed, malaria possible confounder	No
Ahmed et al	The nutritional impacts of soil-transmitted helminths infections among Orang Asli schoolchildren in rural Malaysia	2012	Parasites & Vectors	Malaysia	STHs	Pre-Post study	NA	NA	NA	NA	3 months	R	SAC	254	No	KK, Harada-Mori	Yes	ALB	Medium	Control group deemed unethical but un-infected or low intensity infected children compared with moderate-heavy intensity infected children, Kato-Katz and Harada-Mori faecal testing, treatment observed.	Yes
Akpan et al	Antenatal Deworming and Materno-Perinatal Outcomes in Calabar, Nigeria	2018	Macedonian Journal of Medical Sciences	Nigeria	STH's	RCT	Yes	Computer-generated random numbers	Yes	Participants and investigators	At delivery	NA	PW	530	Yes	NA	NA	MEB	Low	Randomised, double-blind, treatment observed, reasonable sample size, helminths not diagnosed	No
Assis et al	Schistosoma mansoni infection and nutritional status in schoolchildren: a randomized, double-blind trial in northeastern Brazil	1998	American Journal of Clinical Nutrition	Brazil	schisto	RCT	Yes	NR	Yes	Participants and investigators	6 and 12 months	U	SAC	353	Yes	KK	Yes (but only light-moderate included)	OXA	Low	Only light-moderately infected children enrolled but control group, repeat faecal samples checked if 1st faecal sample positive	No
Awasthi et al	Effectiveness and cost-effectiveness of albendazole in improving nutritional status of pre-school children in urban slums	2000	Indian Pediatrics	India	STHs	RCT	Yes	Participants allocated a serial number (odd/non-zero ending placebo group, rest tx group)	Yes	Participants only	2 years	U	PSAC	1045	Yes	Direct smear	No	ALB	Medium	Only single blinding so some children offered ABZ instead of placebo by project workers at each tx stage, calcium placebo could potentially have affected growth, direct smear faecal method, large sample size	No
Beach et al	Assessment of combined ivermectin and albendazole for treatment of intestinal helminth and Wuchereria bancrofti infections in Haitian schoolchildren	1999	American Journal of Tropical Medicine & Hygiene	Haiti	STHs	RCT	Yes	random number table	Yes	Participants and investigators	5 weeks, 4 months, 1 year	U	SAC	853	Yes	Modified Stoll method	Yes	ALB + IVE	Low	Modified Stoll faecal testing but large sample size, double-blind, randomised and treatment observed	No
Befidi-Mengue et al	The impact of Schistosoma haematobium infection and of praziquantel treatment on the growth of primary school children in Bertoua, Cameroon	1992	Journal of Tropical Medicine & Hygiene	Cameroon	schisto + STHs	RCT	Yes (but according to intensity of infection)	NR	Yes	Participants and investigators	6 months	U	SAC	653	Yes	Sedimentation and wet mount, Ames dipstick reagent strips (urine), direct smear (faeces)	Yes	PZQ	Medium	Randomised after stratified according to infection intensity, only male students eligible for study, double-blind intervention, malaria potential confounder	No
Belizario et al	School-based control of soil-transmitted helminthiasis in western Visayas, Philippines	2014	Southeast Asian Journal of Tropical Medicine & Public Health	Philippines	STHs	Pre-Post study	NA	NA	NA	NA	Baseline and after 2 years MDA	NR	SAC	1211	No	KK	Yes	MEB	Medium	Unclear if students randomly selected for sampling, secondary data used for nutritional assessment and un-specified international growth reference standards, but large sample size, Kato-Katz faecal testing	Possibly
Ben-Chetrit et al	Schistosomiasis in pregnant travelers: a case series	2015	Journal of Travel Medicine	Israel	schisto	Case series (retrospective)	NA	NA	NA	NA	Retrospective after births	NA	PW	10 (20 pregnancies, 17 live births)	Yes	ELISA serology, merthiolate–iodine– formaldehyde technique and urinalysis (test not specified)	NR	PZQ	High	Case series, small sample size, some women had remote vs recent exposure, not all women received tx and different exposure and disease risk in travellers cf women living in endemic areas	Possibly
Best et al	Treatment of intestinal parasites in Australian aboriginal children	1976	Medical Journal of Australia	Australia	STHs	Pre-Post study	NA	NA	NA	NA	4 months	NR	SAC	60	No	Direct smear, iodine for cysts and eggs, zinc sulphate flotation	Yes - but arbitrary low, medium, high	THI	High	Different treatments for different participants depending on faecal test results, varying courses of treatment, direct smear faecal testing, small sample size, some children receiving iron supplements and possible confounding due to giardiasis	No
Callender et al	Treatment effects in Trichuris dysentery syndrome	1994	Acta Paediatrica	Jamaica	STHs	Case-control	NA	NA	NA	NA	7.5 weeks (cases only), 6 and 12 months	NR	PSAC+SAC	18	Yes	KK	NR (but probably yes due to KK)	MEB	High	Small case-control study, hospital patients, Kato-Katz faecal tesing	Possibly
Cooper et al	Growth suppression in the Trichuris dysentery syndrome	1990	European Journal of Clinical Nutrition	Jamaica	STHs	Case series	NA	NA	NA	NA	4-8 months	U+R	PSAC+SAC	11	No	KK or formol-ether concentration method, colonscopy for 1 patient	Yes	MEB	High	Small case series, different diagnostic tests used on different participants without further explanation, supine length used to calculate weight for height for some patients but inappopriate given their age (standing height recommended for children >2 years old), children also received a month's worth of iron supplements at hospital discharge, potential confounder if pre-existing micronutrient de…	Possibly
Cooper et al	Catch-up' growth velocities after treatment for Trichuris dysentery syndrome	1995	Transactions of the Royal Society of Tropical Medicine & Hygiene	Jamaica	STHs	Case series	NA	NA	NA	NA	6 months	NR	PSAC+SAC	63 (includes some of the same participants as Callender et al, 1994 and Cooper et al, 1990 studies)	No	Colonoscopy	NR	MEB (post-tx series only)	High	Small case series, replication of participants from 2 previous studies, short report so limited data provided	Possibly
Coutinho et al	Nutritional status improves after treatment of schistosoma japonicum-infected children and adolescents	2006	Journal of Nutrition	Philippines	schisto	Pre-Post study	NA	NA	NA	NA	4 weeks, then q3months until 18 months	R	SAC	477	No	KK, PCR for hookworm species	Yes	PZQ	Medium	Only infected children included in study but 3 stool samples checked prior to enrollment, Tanner staging performed to account for puberty, PCR testing to distinguish hookworm species, wide age range of participants (some technically adults)	Possibly
De Silva et al	Effect of mebendazole therapy during pregnancy on birth outcome	1999	Lancet	Sri Lanka	STHs	Cross-sectional	NA	NA	NA	NA	NA	R+U	PW	3540 (documented anthelmintic)	Yes	NA	NA	MEB	High	Data re anthelmintic treatment obtained from medical records (not certain) or participants (recall bias), LBW threshold 1kg lower than WHO universal LBW threshold, no helminth diagnostics carried out, more of a drug safety trial	Possibly
Degarege et al	Association between intestinal helminth infections and underweight among school children in Tikur Wuha Elementary School, Northwestern Ethiopia	2013	Journal of Infection and Public Health	Ethiopia	STHs + schisto	Pre-Post study	NA	NA	NA	NA	4 weeks	R	SAC	403	No	KK and concentration method	Yes	ALB + PZQ	Medium	Only infected children treated, very short follow-up time, no comparator group	No
Donnen et al	Vitamin A supplementation but not deworming improves growth of malnourished preschool children in eastern Zaire	1998	Journal of Nutrition	DRC	STHs	RCT	Yes	NR	NR	NR	q2weeks for 3 months, then q3months until 12 months	NR	I	311	Yes	KK	Yes	MEB	Medium	Selection bias as children in hospital for severe malnutrition initially, randomisation method not reported, nor whether there was any blinding for the interventions	No
Dossa et al	Impact of iron supplementation and deworming on growth performance in preschool Beninese children	2001	European Journal of Clinical Nutrition	Benin	STHs	RCT	Yes	NR	Yes	Participants and investigators	1, 3 and 10 months	R	PSAC	140	Yes	Direct smear, Kato's concentration method	Yes	ALB	Medium	Randomised but method not reported, abstract states double-blind but no further details, combination of direct smear and Kato concentration method used (direct smear poor diagnostic test for helminth eggs), short trial (3 months) but follow up 7 months later, treatment observed	No
Echazu et al	Albendazole and ivermectin for the control of soil-transmitted helminths in an area with high prevalence of Strongyloides stercoralis and hookworm in northwestern Argentina: A community-based pragmatic study	2017	PLoS Neglected Tropical Diseases	Argentina	STHs	Community-based non-randomised trial	NA	NA	NA	NA	18 months	U+PU	PSAC+SAC	368	Yes	Sedimentation/concentration, agar plate culture, Harada-Mori filter paper culture, Baermann and McMaster	Yes	ALB + IVE	High	Community-based non-randomised trial, comparator group; different communities that received different deworming regime, some participants dewormed once, others 3 times, not necessarily the same cohort at start and end, number of HAZ observations within each group below minimum 400 recommended to perfom comparisons, unclear re timing of follow-up measurements	Yes
Efunshile, A M	School based mass de-worming initiative in South-West Nigeria	2017	African Journal of Clinical and Experimental Microbiology	Nigeria	STHs	Pre-Post study	NA	NA	NA	NA	6 months	U	PSAC+SAC	957	No	Direct microscopy	No	ALB	Medium	Direct microscopy faecal exams (poor sensitivity for helminth eggs, better for protozoa or helminth larvae), considered unethical to have a control group so divided children unto unfected vs un-infected at baseline and all treated, high prevalence levels reported despite use if insensitive diagnostic tests (possible under-reporting)	No
Fernando et al	Geo-helminth infections in a rural area of Sri Lanka	2001	Southeast Asian Journal of Tropical Medicine and Public Health	Sri Lanka	STHs	Pre-Post study	NA	NA	NA	NA	12 and 24 months	R	SAC	349	Yes	Direct saline smears	No	MEB	Medium	Low sensitivity diagnostic test, nutritional status better at baseline in infected children than un-infected, over-the-counter anthelmintics widely available in the study area so may have influenced prevalence levels	No
Forrester et al	Randomised trial of albendazole and pyrantel in symptomless trichuriasis in children	1998	Lancet	Mexico	STHs	Randomised trial	Yes	Block randomisation	Yes	Participants and investigators	4, 8 and 12 months	U	PSAC+SAC	508	Yes	KK	Yes	ALB + PP	Low	Randomised and double-blinded with 3 different interventions groups but control group deemed unethical, kato katz faecal testing, reasonable follow-up time, treatment observed, concerns re possible adverse/toxic effects in high dose albendazole intervention group	Possibly
Garg et al	Evaluation of the Integrated Management of Childhood Illness guidelines for treatment of intestinal helminth infections among sick children aged 2-4 years in western Kenya	2002	Transactions of the Royal Society of Tropical Medicine & Hygiene	Kenya	STHs	RCT	Yes	Computer-generated random number list	Yes	Lab staff and investigators at 6 month follow-up, unclear re participants	6 months	NR	PSAC	347	Yes	Formol-ethyl acetate concentration method	No	MEB	Medium	Selection bias as sick pre-school children enrolled, then only those without palmar pallor randomised for trial, good sensitivity qualitative diagnostic test used, treatment observed, control group	Possibly
Goto et al	Impact of anti-Giardia and anthelminthic treatment on infant growth and intestinal permeability in rural Bangladesh: a randomised double-blind controlled study	2009	Transactions of the Royal Society of Tropical Medicine & Hygiene	Bangladesh	STHs	RCT	Yes	Randomisation function in SPSS	Yes	Participants and investigators	12, 24 and 36 weeks	R	I	222	Yes	Formalin-ether faecal concentration technique	No	ALB	Medium	Randomised and double-blinded but confusion with intervention groups and treatment received so groups had to be re-assigned for analysis and not by untention to treat, sensitive but qualitative diagnostic test	No
Greenberg et al	Single dose piperazine therapy for Ascaris lumbricoides: an unsuccessful method of promoting growth	1981	American Journal of Clinical Nutrition	Bangladesh	STHs	RCT	Yes	NR	Yes	Participants and investigators	6 and 11 months	U	PSAC+SAC	152	Yes	Direct smear, merthiolate iodine formalin solution (to stain and preserve parasite eggs)	Yes	PIP	Low	Randomised, double-blind, control group but insensitive diagnostic test used (more useful for protozoa)	No
Gupta et al	Effect of periodic antiascaris and antigiardia treatment on nutritional status of preschool children	1982	American Journal of Clinical Nutrition	Guatemala	STHs	RCT	Yes	NR	Yes	Participants only	12 months	R	PSAC	159	Yes	Formol-ether concentration method	No	PIP	Low	Randomised, control group, participants blinded, sensitive diagnostic test used, treatment observed, possible confounding by giardiasis	No
Hadju et al	Relationships between soil-transmitted helminthiases and growth in urban slum schoolchildren in Ujung Pandang, Indonesia	1997	International Journal of Food Sciences & Nutrition	Indonesia	STHs	RCT	Yes	based on sex and A.lumbricoides egg count	Yes	Participants and investigators	3, 6 and 12 months	U	SAC	330	Yes	Modified KK	Yes	ALB + PP	Medium	Randomised but based on sex and helminth egg count, double-blind, control group, kato-katz faecal testing	Yes
Hadju et al	Improvements of growth, appetite, and physical activity in helminth-infected schoolboys 6 months after single dose of albendazole	1998	Asia Pacific Journal of Clinical Nutrition	Indonesia	STHs	Controlled trial	No	NA	NR	NR	6 months	U	SAC	129	Yes	Modified KK	Yes	ALB	Medium	Not randomised, only boys enrolled, all children infected at baseline, unclear whether any blinding, control group, kato-katz diagnostic testing	Possibly
Hagel et al	Helminthic infection and anthropometric indicators in children from a tropical slum: Ascaris reinfection after anthelmintic treatment	1999	Journal of Tropical Pediatrics	Venezuela	STHs	Pre-Post study	NA	NA	NA	NA	12 months, then 8 month check for re-infection	U	SAC	154	Yes	MIFC	No	OP/PP	Medium	Placebo control group deemed unethical but sub-group of un-infected children acted as a control group, unclear regarding specific parasitological diagnostic test used but likely insensitive from methods described, but serial stool samples collected	Possibly
Halpenny et al	Regional, household and individual factors that influence soil transmitted helminth reinfection dynamics in preschool children from rural indigenous Panama	2013	PLoS Neglected Tropical Diseases	Panama	STHs	Pre-Post study	NA	NA	NA	NA	3, 9 and 16 months	R	PSAC	215	Yes	KK, FLOTAC	Yes	ALB	Medium	Children living in extreme poverty enrolled, sensitive diagnostic tests, treatment observed	No
Hesham Al-Mekhlafi et al	Pattern and predictors of soil-transmitted helminth reinfection among aboriginal schoolchildren in rural Peninsular Malaysia	2008	Acta Tropica	Malaysia	STHs	Pre-Post study	NA	NA	NA	NA	3 and 6 months	R	SAC	120	Yes	Modified cellophane thick smear (KK), Harada-Mori	Yes	ALB	Medium	Sensitive diagnostic test combination, treatment observed, uses p-value of 0.2 as elimination criterion for univariate and multiple logistic regression (instead of usual 0.05)	No
Hlaing, T	The effect of targeted chemotherapy against ascariasis on the height of children in rural Myanmar	1994	Transactions of the Royal Society of Tropical Medicine and Hygiene	Myanmar	STHs	RCT	Yes	NR	NR	NR	6, 12, 18, 24 months	R	PSAC+SAC	218	Yes	NR	NR	LEV	Medium	Short report so limited data, sub-group of previous study participants (Thein et al, 1991), unclear whether placebo or no treatment for control group, diagnostic test not reported	Possibly
Humphries et al	Effectiveness of albendazole for hookworm varies widely by community and correlates with nutritional factors: A cross-sectional study of school-age children in Ghana	2017	American Journal of Tropical Medicine and Hygiene	Ghana	STHs	Pre-Post study	NA	NA	NA	NA	10-14 days	NR	SAC	76	No	KK	Yes	ALB	Medium	Only hookworm infected children treated, very short follow-up (drug efficacy trial), reasonable diagnostic test although timing important for hookworm egg detection, treatment observed	No
Hurlimann et al	Effect of deworming on school-aged children's physical fitness, cognition and clinical parameters in a malaria-helminth co-endemic area of Cote d'Ivoire	2014	BMC Infectious Diseases	Côte d'Ivoire	STHs + schisto	Pre-Post Study	NA	NA	NA	NA	5 months	R	SAC	213	Yes	KK, urine filtration	Yes	ALB + PZQ	Medium	Relatively short follow-up period, appropriate diagnostics, possible confounding by malaria/giardiasis	No
Intra et al	Multiple parasitic infestation in a nine-month-old patient: a case report	2019	Helminthologia	Italy	STHs	Case report	NA	NA	NA	NA	15 and 30 days	NR	I	1	No	Concentration method (no further details specified)	NR	MEB	High	Case report, unclear reporting of diagnostics and not much mention of growth retardation/stunting	Possibly
Jinabhai et al	Epidemiology of helminth infections: implications for parasite control programmes, a South African perspective	2001	Public Health Nutrition	South Africa	STHs + schisto	RCT	Yes	NR	NR	NR	2 and 16 weeks	R	SAC	268	Yes	Direct smear, urine filtration	Yes	ALB + PZQ	Medium	Randomisation but blinding not reported, unclear diagnostic faecal testing, methods incorrectly describe weight-for-age as a measure of wasting	No
Jinabhai et al	A randomized controlled trial of the effect of antihelminthic treatment and micronutrient fortification on health status and school performance of rural primary school children	2001	Annals of Tropical Paediatrics	South Africa	STHs + schisto	RCT	Yes	NR	Yes	Participants and investigators	16 weeks	R	SAC	579	Yes	Direct smear, urine filtration	Yes	ALB + PZQ	Medium	Randomised and double-blind but unclear diagnostic faecal test and incorrect infection intensity categories provided for S.haematobium, relatively short follow-up but limited by school term length, control group, possible confounding due to micronutritent status and supplements	No
Joseph et al	The Effect of Deworming on Growth in One-Year-Old Children Living in a Soil-Transmitted Helminth-Endemic Area of Peru: A Randomized Controlled Trial	2015	PLoS Neglected Tropical Diseases	Peru	STHs	RCT	Yes	Block randomisation - computer generated	Yes	Participants and investigators	6 and 12 months	R	I	1563	Yes	KK or direct smear	Yes	MEB	Medium	Randomisation, double-blind, large and appropriate sample size, control group, treatment observed, less sensitive diagnostic faecal test used for children receiving placebo as part of trial compared to those receiving deworming treatment, compliance issues as about 25% of participants received deworming from outside the trial during study period	No
Kaminsky et al	Growth retardation and severe anemia in children with Trichuris dysenteric syndrome	2015	Asian Pacific Journal of Tropical Biomedicine	Honduras	STHs	Case series	NA	NA	NA	NA	NA	NR	PSAC+SAC	13	No	Direct smear	Yes	PIP/ALB/MEB/IVE	High	Small case series, only children with heavy trichuriasis enrolled, insensitive diagnostic method used (better for protozoa), only semi-quantitative diagnostic method yet used for infection intensity	Possibly
KF Michaelsen	Hookworm infection in Kweneng District, Botswana, A prevalence survey and a controlled treatment trial	1985	Transactions of the Royal Society of Tropical Medicine & Hygiene	Botswana	STHs	RCT	Yes	NR	NR	NR	2 weeks, 5 months	R	SAC	195	Yes	Brine flotation method, Stoll's technique, test-tube hatching for species identification	Yes	TET	Low	Randomised, blinding not reported, different anthelmintic used compared with most studies, relatively short follow-up, appropriate diagnostic tests	No
Kightlinger et al	Ascaris lumbricoides aggregation in relation to child growth status, delayed cutaneous hypersensitivity, and plant anthelmintic use in Madagascar	1996	Journal of Parasitology	Madagascar	STHs	Pre-Post study	NA	NA	NA	NA	12 months	R	PSAC+SAC	550	No	Formalin-detergent sedimentation method	Yes	MEB + PP	Medium	Very high helminth prevalence and heavy intensity infections at baseline, diagnostic test can be used for semi-quantitative results as in this case, long follow-up period but potentially high risk of re-infection	No
Kruger et al	Effects of iron fortification in a school feeding scheme and anthelmintic therapy on the iron status and growth of six- to eight-year-old schoolchildren	1996	Food and Nutrition Bulletin	South Africa	STHs	RCT	Yes	NR	NR	NR	6 and 11 months	U+R	SAC	134	Yes	Direct smear	No	ALB	Medium	Randomised, blinding not reported, insensitive diagnostic test for helminths, treatment observed, possible confounding due to micronutrient supplementation	No
Lai et al	Ascaris and Trichuris do not contribute to growth retardation in primary school children	1995	Southeast Asian Journal of Tropical Medicine & Public Health	Malaysia	STHs	RCT	Yes	Block randomisation and even/odd ending numbers	Yes	Participants only	6, 12, 18 and 24 months	U+PU	SAC	353	Yes	Stoll dilution technique	Yes	MEB + PP	Low	Randomised, single-blind, quantitative and appropriate diagnostic test used, treatment observed, control group and 3 stool samples checked at enrollment	No
Larocque et al	A double-blind randomized controlled trial of antenatal mebendazole to reduce low birthweight in a hookworm-endemic area of Peru	2006	Tropical Medicine & International Health	Peru	STHs	RCT	Yes	Computer-generated randomly ordered blocks	Yes	Participants and investigators	Baseline (2nd trimester), 3rd trimester and delivery	R+PU	PW	950	Yes	KK	Yes	MEB	Low	Randomised, double-blind, large sample size, appropriate diagnostic test	Possibly
Liu et al	Effect of deworming on indices of health, cognition, and education among schoolchildren in rural China: A cluster-randomized controlled trial	2017	American Journal of Tropical Medicine and Hygiene	China	STHs	RCT	Yes	Randomisation by township (cluster), computerised random sequence generator	No	NA	6 and 11 months	R	SAC	2028	Yes	KK	Yes	ALB	Low	Randomisation by township, control group received no intervention (not a placebo), no explicit blinding but control group not aware they were part of a trial, large sample size, 2 faecal samples collected from consecutive days, appropriate diagnostic test, treatment not observed	No
Longfils et al	Weekly iron and folic acid supplementation as a tool to reduce anemia among primary school children in Cambodia	2005	Nutrition Reviews	Cambodia	STHs	Cluster intervention study	NA	NA	NA	NA	12 months	R	SAC	412	Yes	KK, sodium-acetate-acetic-formalin (SAF) method, Baermann	Yes	MEB	Medium	Pre-post cluster study, discrepencies and confusion regarding accurate age of children, combination of sensitive diagnostic tests, possible confounding from micronutrient deficiency and supplements	No
McGarvey et al	Schistosomiasis japonica and childhood nutritional status in northeastern Leyte, the Philippines: a randomized trial of praziquantel versus placebo	1996	American Journal of Tropical Medicine & Hygiene	Philippines	schisto	RCT	Yes	Random numbers	Yes	Participants and investigators	6 months	R	PSAC+SAC	170	Yes	KK	Yes	PZQ	Low	Only infected children enrolled, very wide age range, randomised and double-blind, treatment observed, relatively short follow-up	No
Mofid et al	A Double-Blind Randomized Controlled Trial of Maternal Postpartum Deworming to Improve Infant Weight Gain in the Peruvian Amazon	2017	PLoS Neglected Tropical Diseases	Peru	STHs	RCT	Yes	Computer-generated random number sequence	Yes	Particpants and investigators	1 and 6 months	NR	BFW	968	Yes	KK, direct smear and ethyl-ether concentration method on stored samples after 6 months	Yes	ALB	Low	Randomised, double-blinded, large sample size, appropriate diagnostic tests	Possibly
Ndibazza et al	Effects of deworming during pregnancy on maternal and perinatal outcomes in Entebbe, Uganda: a randomized controlled trial	2010	Clinical Infectious Diseases	Uganda	STHs + schisto	RCT	Yes	Block randomisation using Stata	Yes	Participants and investigators	at delivery and 14 weeks after delivery	PU+R	PW	2289	Yes	KK, charcoal culture for S. strongyloides	Yes	ALB + PZQ	Low	Randomised, double-blinded, large sample size, appropriate diagnostic tests	Possibly
Nga et al	Decreased parasite load and improved cognitive outcomes caused by deworming and consumption of multi-micronutrient fortified biscuits in rural Vietnamese schoolchildren	2011	American Journal of Tropical Medicine and Hygiene	Vietnam	STHs	RCT	Yes	Block randomisation using computer-generated list	Yes	Participants and investigators	2 and 4 months	R	SAC	482	Yes	KK	Yes	ALB	Low	Randomised, double-blind, appropriate sample size and diagnostic test	No
Nokes et al	Evidence for an improvement in cognitive function following treatment of Schistosoma japonicum infection in Chinese primary schoolchildren	1999	American Journal of Tropical Medicine & Hygiene	China	STHs + schisto	RCT	Yes	NR	Yes	Participants and investigators	3 months	NR	SAC	181	Yes	KK	Yes	ALB + PZQ	Medium	Only infected children recruited, relatively short follow-up time, randomised, double-blind, appropriate sample size and diagnostic test	No
Northrop-Clewes et al	Anthelmintic treatment of rural Bangladeshi children: effect on host physiology, growth, and biochemical status	2001	American Journal of Clinical Nutrition	Bangladesh	STHs	RCT	Yes	Household numbers from clinic records (randomised by village)	Yes	Participants and investigators	2, 4, 6, 8 and 12 months	R	PSAC	117	Yes	Modified ether sedimentation technique	Yes	PP + MEB	Low	Randomised by village, double-blind, control group, long follow up	No
Osakunor et al	Dynamics of paediatric urogenital schistosome infection, morbidity and treatment: a longitudinal study among preschool children in Zimbabwe	2018	BMJ Global Health	Zimbabwe	schisto	Pre-Post study	NA	NA	NA	NA	3 and 12 months	R	PSAC	156	Yes	Urine filtration method, KK	Yes	PZQ	Medium	Only infected children treated, small sample size, appropriate diagnostics	Yes
Ostwald et al	The effect of intestinal parasites on nutritional status in well-nourished school-age children in the highlands of Papua New Guinea	1984	Nutrition Reports International	PNG	STHs	RCT	Yes	coin toss	NR	NR	2 and 5 months	R	SAC	87	Yes	Concentrated saline dilutions and McMaster	Yes	MEB	Medium	Small sample size, control group un-treated (not placebo), randomisation, appropriate diagnostic test	No
Passerini et al	Increased birth weight associated with regular pre-pregnancy deworming and weekly iron-folic acid supplementation for Vietnamese women	2012	PLoS Neglected Tropical Diseases	Vietnam	STHs	Controlled trial	NA	NA	NA	NA	at delivery	R	PW	463	Yes	NA	NA	ALB	Medium	No randomisation, control hospital women were un-treated (no placebo), appropriate sample size but no diagnostic testing for helminths	Yes
Rousham et al	An 18-month study of the effect of periodic anthelminthic treatment on the growth and nutritional status of pre-school children in Bangladesh	1994	Annals of Human Biology	Bangladesh	STHs	RCT	Yes	NR (randomised by village)	NR	NR	18 months	R	PSAC+SAC	1402	Yes	Modified sedimentation technique	Yes	MEB	Low	Randomisation by village, large sample size, appropriate diagnostic test, control group	No
S Mahendra Raj	Intestinal geohelminthiasis and growth in pre-adolescent primary school children in Northeastern Peninsular Malaysia	1998	Southeast Asian Journal of Tropical Medicine & Public Health	Malaysia	STHs	Pre-Post study	No	NA	No	NA	12 months	U	SAC	98	Yes	Modified Stoll count	Yes	ALB	Medium	High baseline prevalence, only infected children treated, appropriate diagnostic test	No
Sarkar et al	Effect of deworming on nutritional status of Ascaris infested slum children of Dhaka, Bangladesh	2002	Indian Pediatrics	Bangladesh	STHs	RCT	Yes	Random number table	Yes	Participants and investigators	4 months	U	PSAC+SAC	81	Yes	Direct smear	No	PP	Medium	Only infected children enrolled, brief report rather than full article so limited data, insensitive diagnostic test used, small sample size, relatively short follow-up	No
Satya Deepti et al	Effects of deworming during pregnancy on maternal and perinatal outcomes: A randomized controlled trial	2015	Research Journal of Pharmaceutical, Biological and Chemical Sciences	India	STHs	RCT	Yes	Block randomisation using Stata	Yes	Participants and investigators	At delivery and then within 14 weeks of delivery	PU+R	PW	408	Yes	NR	Yes	ALB + MEB	Medium	Randomised, double-blind, large sample size, diagnostic test not reported but stool samples collected, treatment oberved	No
Shield et al	Intestinal helminthiasis and nutritional status including iron, zinc and copper in Papua New Guinea urban children aged 1 to 5 years and effect of anthelmintic intervention	1986	Papua New Guinea Medical Journal	PNG	STHs	Pre-Post study	NA	NA	NA	NA	3, 6 and 8 months	U	PSAC	281?	Yes	Harada-Mori culture, direct smears and McMaster	Yes	PP, MEB + THI	Medium	Only infected children treated, small sample size, appropriate diagnostics but some combined egg count data, malaria possible confounder	No
Simeon et al	Treatment of Trichuris trichiura infections improves growth, spelling scores and school attendance in some children	1995	Journal of Nutrition	Jamaica	STHs	RCT	Yes	Random number table	NR	NR	6 months	U+R	SAC	392	Yes	KK	Yes	ALB	Medium	Randomised, appropriate diagnostic test, relatively short follow-up	No
Sircar et al	Schistosoma mansoni Mass Drug Administration Regimens and Their Effect on Morbidity among Schoolchildren over a 5-Year Period-Kenya, 2010-2015	2018	American Journal of Tropical Medicine & Hygiene	Kenya	STHs + schisto	Pre-Post study	NA	NA	NA	NA	1, 3 and 5 years	R	SAC	512 (year 5)	Yes	KK	Yes (for S. mansoni only)	PZQ + ALB	Medium	Long follow-up period to evaluate MDA, appropriate diagnostic test, large sample size, comparing school-based deworming group with community-based deworming group	No
Staudacher et al	Soil-transmitted helminths in southern highland Rwanda: associated factors and effectiveness of school-based preventive chemotherapy	2014	Tropical Medicine & International Health	Rwanda	STHs	Pre-Post study	NA	NA	NA	NA	2 and 15 weeks	R+U	SAC	510	Yes	KK, real-time PCR for A. lumbricoides, 10% checked by formalin-ethyl acetate microscopy	Yes	MEB	Medium	Very short follow-up evaluating MDA efficacy, appropriate diagnostic tests (PCR very sensitive), large sample size	Yes
Stephenson et al	Relationships between Ascaris infection and growth of malnourished preschool children in Kenya	1980	American Journal of Clinical Nutrition	Kenya	STHs	Pre-Post study	NA	NA	NA	NA	14 and 28 weeks	R	PSAC+SAC	290	Yes	Modified Telemann's method	No	LEV	Medium	Unclear re sensitivity of diagnostic tests used, reasonable follow-up period	No
Stephenson et al	Relationships of Schistosoma haematobium, hookworm and malarial infections and metrifonate treatment to growth of Kenyan school children	1985	American Journal of Tropical Medicine & Hygiene	Kenya	STHs + schisto	RCT	Yes	NR	NR	NR	6 months	NR	SAC	399	Yes	Modified KK, nuclepore filter method for S. haematobium	Yes	MET	Medium	Only infected children enrolled, randomised, large sample size, appropriate diagnostic tests, control group, possible malaria confounder	No
Stephenson et al	Single dose metrifonate or praziquantel treatment in Kenyan children. II. Effects on growth in relation to Schistosoma haematobium and hookworm egg counts	1989	American Journal of Tropical Medicine & Hygiene	Kenya	STHs + schisto	Controlled trial	NA	NA	NR	NR	8 months	NR	SAC	312	Yes	NR	Yes	PZQ/MET	Medium	Unclear re allocation to intervention groups but not randomised, reasonable follow-up period, diagnostic tests not reported, large sample size	No
Stephenson et al	Treatment with a single dose of albendazole improves growth of Kenyan schoolchildren with hookworm, Trichuris trichiura, and Ascaris lumbricoides infections	1989	American Journal of Tropical Medicine & Hygiene	Kenya	STHs	RCT	Yes	NR	Yes	Investigators only?	6 months	NR	SAC	150	Yes	Modified KK	Yes	ALB	Medium	Randomised, small sample size, appropriate diagnostic test, relatively short follow-up, treatment observed	Yes
Stephenson et al	Physical fitness, growth and appetite of Kenyan school boys with hookworm, Trichuris trichiura and Ascaris lumbricoides infections are improved four months after a single dose of albendazole	1993	Journal of Nutrition	Kenya	STHs	RCT	Yes	By descending hookworm egg count?	Yes	Investigators only?	4 months	NR	SAC	53	Yes	Modified KK	Yes	ALB	Medium	Only boys enrolled, small sample size, randomised according to hookworm egg counts, appropriate diagnostic test (although less sensitive for hookworm eggs)	Yes
Stoltzfus et al	School-based deworming program yields small improvement in growth of Zanzibari school children after one year	1997	Journal of Nutrition	Tanzania	STHs	RCT	Yes	NR (randomised by district)	NR	NR	12 months	NR	SAC	3063	Yes	KK, hemastix test strips for urine (microhaematuria used as a proxy indicator for S. haematobium)	Yes	MEB	Medium	Randomised by district, control group, large sample size, appropriate faecal diagnostic test, potentially less sensitive urinary diagnostic test	Yes
Stoltzfus et al	Low dose daily iron supplementation improves iron status and appetite but not anemia, whereas quarterly anthelminthic treatment improves growth, appetite and anemia in Zanzibari preschool children	2004	Journal of Nutrition	Tanzania	STHs	RCT	Yes	Block randomisation (randomised by household)	Yes	Participants and investigators	12 months	R	PSAC+SAC	459	Yes	KK	Yes	MEB	Low	Randomised by household, double-blind, large sample size, appropriate diagnostic test, treatment observed, possible malaria confounder	No
Tanner et al	Longitudinal study on the health status of children in a rural Tanzanian community: parasitoses and nutrition following control measures against intestinal parasites	1987	Acta Tropica	Tanzania	STHs + schisto	Community-based non-randomised trial	NA	NA	NA	NA	6 and 18 months	R	PSAC+SAC	170	Yes	Urine filtration and dipstick, KK, agar plate culture, merthiolate-iodine-formalin method mainly for protozoa	NR	ALB	Medium	Long follow-up, anthelmintic treatment not give as a sole intervention at any stage, sensitive combination if diagnostic tests, malaria possible confounder	No
Taylor et al	The effect of different anthelmintic treatment regimens combined with iron supplementation on the nutritional status of schoolchildren in KwaZulu-Natal, South Africa: a randomized controlled trial	2001	Transactions of the Royal Society of Tropical Medicine & Hygiene	South Africa	STHs + schisto	RCT	Yes	NR	Yes	Participants and investigators	6 and 12 months	R	SAC	275	Yes	Formol-ether concentration method, Ecur dipstick test on urine	NR	ALB + PZQ	Low	Randomised, double-blind, sensitive diagnostic tests (Ecur possibly less so), long follow-up time, treatment observed	No
Tee et al	Growth reduction among primary schoolchildren with light trichuriasis in Malaysia treated with albendazole	2013	Southeast Asian Journal of Tropical Medicine & Public Health	Malaysia	STHs	RCT	Yes	Randomisation software	NR	NR	3, 6 and 12 months	R	SAC	33	Yes	Modified Stoll's concentration technique	Yes	ALB	Medium	Only infected children enrolled, randomised, small sample size, relatively long follow-up, appropriate diagnostic tests but no repeat stool samples collected	No
Thein et al	A controlled chemotherapeutic intervention trial on the relationship between Ascaris lumbricoides infection and malnutrition in children	1991	Transactions of the Royal Society of Tropical Medicine & Hygiene	Myanmar	STHs	RCT	Yes	NR (randomised by village)	NA	NA	6 and 12 months	PU	SAC	2439	Yes	Direct smear	NR	LEV	Medium	Randomised by village, control group, long follow-up, insensitive diagnostic test, large sample size	Possibly
Walia et al	Routine deworming during antenatal care decreases risk of neonatal mortality and low birthweight: A retrospective cohort of survey data	2021	PLoS Neglected Tropical Diseases	Multi-country (56)	STHs	Retrospective cohort survey study	NA	NA	NA	NA	Retrospective after births	NA	PW	772155	No	NA	NA	NR	Medium	No helminth diagnostic tests carried out, uses DHS data, unknown anthelmintic treatment, very large retrospective survey	Yes
Watkins & Pollitt	Effect of removing Ascaris on the growth of Guatemalan schoolchildren	1996	Pediatrics	Guatemala	STHs	RCT	Yes	NR	Yes	Participants and investigators	12 and 24 weeks	NR	SAC	228	Yes	KK	Yes	ALB	Low	Randomised, double-blind, appropriate diagnostic test, relatvely short follow-up	No
Willett et al	Ascaris and growth rates: a randomized trial of treatment	1979	American Journal of Public Health	Tanzania	STHs	RCT	Yes	Random number table	Yes	Participants and investigators	12 months	R	PSAC+SAC	273	Yes	Modified formol-ether concentration technique	Yes	LEV	Low	Randomised, double-blind, appropriate diagnostic test, treatment observed, relatively long follow-up	No
Yap et al	Effect of deworming on physical fitness of school-aged children in Yunnan, China: a double-blind, randomized, placebo-controlled trial	2014	PLoS Neglected Tropical Diseases	China	STHs	RCT	Yes	Block randomisation	Yes	Participants and investigators	1, 4 and 6 months	R	SAC	194	Yes	KK, Baermann	Yes	ALB	Low	Randomised, double-blind, relatively short follow-up, treatment observed, appropriate diagnostic test combination	No
Zanwar et al	An unusual cause of overt gastrointestinal bleeding in a malnourished child	2016	Tropical Doctor	India	STHs	Case report	NA	NA	NA	NA	2 weeks	NR	SAC	1	No	Colonoscopy	No	ALB	High	Case report but clear reporting of history, presentation, symptoms, diagnosis, treatment and outcome	Possibly
Zhou et al	Sex differences in the malnourished status of Chinese children due to schistosomiasis infections and inadequate dietary intake	2005	Environmental Sciences	China	schisto	Pre-Post study	NA	NA	NA	NA	7 months	R	SAC	389	No	KK	Yes	PZQ	Medium	Only infected children treated, no control group, appropriate diagnostic test	No

## Sheet: Data dictionary
Codes/abbreviations:
Helminths	STHs	soil-transmitted helminths					Diagnostics	KK	Kato-Katz
	schisto	schistosomes						ELISA	Enzyme-linked immunosorbent assay
Setting	R	rural						MIFC	merthiolate-iodine-formaldehyde-concentration technique
	U	urban						FLOTAC	faecal flotation technique
	PU	peri-urban					General	NA	not applicable
Demographic group	PSAC	pre-school age children (0-5 years old)						NR	not reported
	SAC	school-aged children (5+ to 20 years old)						ROB	risk of bias
	I	infants (0-1 year old)						MDA	mass drug administration
	PW	pregnant women					Risk of bias		low
	BFW	breast-feeding women							medium
Anthelmintic	ALB	albendazole							high
	MEB	mebendazole					Association?	Yes	Significant association found between helminth infection and stunting
	PZQ	praziquantel						Possibly	Some association between helminth infection and stunting may have been found, or a suggestion of benefit with anthelmintic treatment, but no statistically signigicant association was found. Also applies when a suspected association was found in case reports and case series, as these study designs provide a weaker level of evidence.
	IVE	ivermectin						No	No significant association found between helminth infection and stunting
	LEV	levamisole
	PP	pyrantel pamoate
	OP	oxantel pamoate
	PIP	piperazine
	THI	thiabendazole
	MET	metrifonate
	OXA	oxamniquine
	TET	tetrachloroethylene
